# Supplementary material for: Oxford Video Informed Consent Tool (OxVIC): a pilot study of informed video consent in spinal surgery and preoperative patient satisfaction
Source: PubMed Central journal article supplement — BMJ Open. 2019 Jul 24;9(7):e027712. doi: 10.1136/bmjopen-2018-027712 (PMC6661683; doi:10.1136/bmjopen-2018-027712), 2019-07-24

# BMJ Open

BMJ Open is committed to open peer review. As part of this commitment we make the peer review history of every article we publish publicly available.

When an article is published we post the peer reviewers' comments and the authors' responses online. We also post the versions of the paper that were used during peer review. These are the versions that the peer review comments apply to.

The versions of the paper that follow are the versions that were submitted during the peer review process. They are not the versions of record or the final published versions. They should not be cited or distributed as the published version of this manuscript.

BMJ Open is an open access journal and the full, final, typeset and author-corrected version of record of the manuscript is available on our site with no access controls, subscription charges or pay-per-view fees (<http://bmjopen.bmj.com>).

If you have any questions on BMJ Open's open peer review process please email [editorial.bmjopen@bmj.com](mailto:editorial.bmjopen@bmj.com)

# BMJ Open

## OXFORD INFORMED VIDEO CONSENT TOOL (OXIVCT): A PILOT STUDY OF INFORMED VIDEO CONSENT IN SPINAL SURGERY AND ITS IMPACTS ON PREOPERATIVE PATIENT SATISFACTION.

|                               |                                                                                                                                                                                                                                                                                                                                                                                                                                                                                                                                                     |
|-------------------------------|-----------------------------------------------------------------------------------------------------------------------------------------------------------------------------------------------------------------------------------------------------------------------------------------------------------------------------------------------------------------------------------------------------------------------------------------------------------------------------------------------------------------------------------------------------|
| Journal:                      | <i>BMJ Open</i>                                                                                                                                                                                                                                                                                                                                                                                                                                                                                                                                     |
| Manuscript ID                 | bmjopen-2018-027712                                                                                                                                                                                                                                                                                                                                                                                                                                                                                                                                 |
| Article Type:                 | Research                                                                                                                                                                                                                                                                                                                                                                                                                                                                                                                                            |
| Date Submitted by the Author: | 05-Nov-2018                                                                                                                                                                                                                                                                                                                                                                                                                                                                                                                                         |
| Complete List of Authors:     | Mawhinney, Gerard; Oxford University Hospitals NHS Foundation Trust Nuffield Orthopaedic Centre, Spinal Surgery; Nuffield Department of Clinical Medicine Division of Experimental Medicine, Thakar, Chrisan; Oxford University Hospitals NHS Foundation Trust Nuffield Orthopaedic Centre, Spinal Surgery<br>Rothenfluh, Dominique; Oxford University Hospitals NHS Foundation Trust Nuffield Orthopaedic Centre, Spinal Surgery<br>Reynolds, Jeremy; Oxford University Hospitals NHS Foundation Trust Nuffield Orthopaedic Centre, Spinal Surgery |
| Keywords:                     | Video consent, Informed consent, Patient satisfaction, Spinal surgery                                                                                                                                                                                                                                                                                                                                                                                                                                                                               |
|                               |                                                                                                                                                                                                                                                                                                                                                                                                                                                                                                                                                     |

SCHOLARONE™  
Manuscripts

1  
2  
3 **OXFORD INFORMED VIDEO CONSENT TOOL (OXIVCT): A PILOT STUDY OF**  
4 **INFORMED VIDEO CONSENT IN SPINAL SURGERY AND ITS IMPACTS ON**  
5 **PREOPERATIVE PATIENT SATISFACTION.**  
6  
7  
8  
9  
10

11 **Gerard Mawhinney<sup>1,2</sup>, Chrisan Thakar<sup>1</sup>, Dominique A. Rothenfluh<sup>1</sup>, Jeremy**  
12 **Reynolds<sup>1</sup>**  
13  
14  
15  
16  
17  
18  
19  
20  
21  
22  
23

24 **1: Oxford University Hospitals NHS Foundation Trust, Headley Way, Oxford, OX3**  
25 **9DU, UK.**  
26

27 **2: Nuffield Department of Medicine, Experimental Medicine Division, University of**  
28 **Oxford, John Radcliffe Hospital, Headley Way, Oxford, OX3 9DU, UK.**  
29  
30  
31  
32  
33  
34  
35  
36  
37  
38  
39

40 **Corresponding Author: Mr. Gerard Mawhinney**

41 **Corresponding Email: [gerard.mawhinney@ouh.nhs.uk](mailto:gerard.mawhinney@ouh.nhs.uk)**  
42  
43  
44  
45  
46  
47  
48  
49  
50  
51  
52  
53  
54  
55  
56  
57  
58  
59  
60

## ABSTRACT

**Objectives:** A ‘three-legged stool’ approach to consent, advocated by British Association of Spinal Surgeons (BASS) calls for updates in consenting practice. This study investigates the utility and acceptability of a personalised video consent tool to enhance patient satisfaction in the preoperative consent giving process.

**Design:** Pilot study using questionnaires to assess video consent and its impacts on preoperative patient satisfaction.

**Setting:** A single centre, pilot study of individuals undergoing surgery at a regional spinal centre in the UK.

**Outcome measure:** As part of preoperative planning, a self-administered questionnaire regarding patient satisfaction with the use of a video consent tool as an adjunct to traditional consenting methods was completed.

**Participants:** 20 participants with a mean age of 56 years ( $SD = 16.26$ ). who watched their personalised consent video at least once prior to consenting for surgery.

**Results:** Median number of video views were 2-3 times. 85% of patients watched the video with next of kin and family members. 80% of participants reported that the video consent tool helped to their address preoperative concerns. All participants stated they would use the video consent service again. All would recommend the service to others requiring surgery. Implementing the video consent tool did not endure any significant time or costs.

**Conclusions:** Introduction of a video consent tool was a positive adjunct to traditional consenting methods. Patient – clinician consent dialogue can now be documented. A randomised controlled study to further evaluate the effects of video consent on patients’ retention of information, pre and postoperative anxiety, PROMS and length of stay is in process.

**Key Words:** Video consent, Informed consent, Patient satisfaction, Spinal surgery.

## ARTICLE SUMMARY

### What this pilot study adds to the literature:

1. First report of a personalised consent tool in preoperative care (currently deficient in the published literature)
2. First report of a multimedia consent adjunct used outside of the clinical environment, allowing patients to review their consent dialogue at a time and place convenient to them.
3. First report of a personalised consent adjunct promoting shared decision making and promoting patient empowerment.
4. First report of a correlation between frequency of interaction with multimedia consent adjuncts and patient satisfaction levels.
5. First report of multimedia to document the patient – clinician consent conversation

### Strengths and limitations of this study

The strengths of the study have been outlined above. Although this pilot has achieved its overall aim, it is important to acknowledge the limitations. As a small non-randomised study, further work is needed to provide robust conclusions. While the quantitative data collected yielded statistical data, the introduction of qualitative data collection methods could provide further insights into patient satisfaction and experience.

## INTRODUCTION

Informed consent is a legal and ethical principle which is required prior to any intervention that may violate autonomy. The *Montgomery v Lanarkshire* judgement (1) initiated a change in how healthcare professionals obtain informed consent. *Montgomery* (1) confirms the shift from an already eroding paternalistic approach to consent set by *Bolam v Friem Hospital Management Committee*,(2), to the adoption and acknowledgment of a person-centred approach seen in *Sidaway v Bethlem Royal Hospital* (3), *De Freitas v O'Brien* (4) and *Bolitho v City & Hackney HA* (5). Others concur that *Montgomery* marked a decisive shift in the legal test of duty of care, from the perspective of the clinician to that of the patient (6).

In acknowledgement of the recent changes in consenting practice, the British Association of Spinal Surgeons (BASS) recently published consent guidelines (7). BASS advocates a ‘three-legged stool’ model to informed spinal consent. The three pillars of this model are: 1) provide

1  
2  
3 patient information, 2) engage in and document patient centred dialogue and 3) provide  
4 procedure specific information. However, there is currently a gap in consenting practice  
5 relating to documenting the preoperative consent conversations. Preparing to undergo surgery  
6 is a stressful event for both patients and their families, often important information discussed  
7 within the consent consultation is forgotten (8). By providing patients access to a tool that  
8 captures their consent conversation, it is proposed that the video will provide them with an  
9 opportunity to reflect and revisit the previously discussed dialog, prior to consenting to  
10 treatment. The addition of this step to the preoperative consenting process may safeguard  
11 patients from medical coercion and promote autonomy to make an informed decision about  
12 their care, while reducing potential litigation claims.  
13  
14  
15  
16  
17  
18  
19  
20  
21

22 Enhancements in digital technology are driving changes in information practices, which has  
23 influenced how informed consent may be delivered (9), examples include the use of iPads to  
24 deliver consent information (10) to the use of a smartphone app's to assist informed consenting  
25 practice (11). The acceptance of multimedia technology in preoperative consenting has been  
26 demonstrated across a variety of surgical disciplines, foot & ankle surgery (12), spinal surgery  
27 (13), vascular surgery (14), ophthalmic surgery (15), gastrointestinal surgery (16) and  
28 urological surgery (17). Notably, such preoperative multimedia consent technologies are often  
29 generic and not patient specific. There is currently a lack of research regarding the use of  
30 personalised multimedia consenting adjuncts within surgery.  
31  
32  
33  
34  
35  
36  
37  
38  
39

40 In order to improve service delivery and comply with the updated guidelines, we piloted a  
41 video consent tool as an adjunct to traditional consenting methods for patients attending a  
42 spinal Preoperative Outpatient Assessment Clinic (POAC). To our knowledge the use of an  
43 informed video consent tool has not been used before in spinal surgery. The aims of the study  
44 were to evaluate acceptability of a novel consent tool as an adjunct to traditional verbal and  
45 written consent in patients attending a spinal POAC, while providing documentary evidence of  
46 the patient – clinician consent conversation, which now forms part of the medical notes,  
47 improve patient experience and enhance patient satisfaction within the preoperative consent  
48 process and generate an evidence base for future research.  
49  
50  
51  
52  
53  
54  
55

## 56 **METHODS**

### 57 **Procedure**

1  
2  
3 We conducted a single centre, non-randomised, non-comparative pilot study in patients  
4 undergoing a spinal procedure at a spinal centre in the UK. A flowchart of the study procedure  
5 is outlined on Figure 1. All participants who agreed to take part were consented by fellowship  
6 trained Consultant Spinal Surgeons using verbal and written consenting methods in addition to  
7 a precis of the consent consultation being recorded. Participants were all informed that their  
8 participation was voluntary and they were free to withdraw at any time. The precis was  
9 conducted in a structured way and consisted of the following, a discussion around the patients  
10 reasoning for choosing surgery, followed by an overview of the surgical procedure, its intended  
11 benefits and associated risks ending with an opportunity for the patients' to check their  
12 understanding by asking questions.  
13  
14  
15  
16  
17  
18  
19  
20  
21

22 A password protected email and a hospital trust approved web transfer service was used to  
23 send the personalised consent videos to study participants. Participants reviewed their  
24 personalised consent consultations at home with their family or friends. Participants had the  
25 option to forward their personal consent videos to family members outside of the UK. All,  
26 participants were invited to contact the spinal team, to seek clarity or ask further questions  
27 regarding the video content (two participants utilised this service). The recorded consent was  
28 stored securely within the patient's electronic health records, accessible only to the research  
29 team. Participants were asked to contact the spinal team once they had reviewed the consent  
30 conversation, acknowledging the risks and benefits of the proposed treatment. Prospective data  
31 from patients was obtained in the form a self-administered questionnaire regarding patient  
32 satisfaction with the use of a video consent tool as an adjunct to traditional consenting methods.  
33 Participants were invited to complete the measure following the consent consultation and after  
34 reviewing their personalised consent video.  
35  
36  
37  
38  
39  
40  
41  
42  
43  
44  
45

## 46 **Participants**

47 Participants were recruited over a four month period (September to December 2017).  
48 Twenty two people were approached to take part, two declined, twenty volunteered. (n=20).  
49 Participants did not receive a honorarium for taking part in the study. Study inclusion criteria  
50 were: all participants must be over the age of 18 years of age and have capacity to make  
51 informed decisions. Participants were also required to have an active email address with  
52 access to the internet. Participants were excluded from the study if they lacked capacity to  
53 make informed decisions or if they had any visual or hearing impairments which may inhibit  
54 their ability to review their consent video.  
55  
56  
57  
58  
59  
60

## Assessments

Electronic Self-Administered Questionnaires (SAQ) were distributed via email to patients who agreed to partake in the study. Participant demographics, which included gender, age, number of times the video consent tool was viewed as well as who they watched it with was collected. In addition to this, quantitative data was collected via the validated CSQ-8 tool (18) . The tool consists of eight questions, each constructed with a four point Likert scale reply.

Data was collected at one point, post consent consultation. The minimum achievable satisfaction score is 8, indicating poor satisfaction, a maximum score of 32 would indicate high levels of satisfaction (19, 20). The CSQ-8 tool has been extensively tested for reliability and validity (19-21), to date it has been translated into more than 30 languages since its first launch in the early 1980's (22).

## Data analysis

The data collection period finished once 20 completed SAQ's were received. Normality of data was assessed using a Kolmogorov-Smirnov test. Descriptive, bivariate and inferential statistics were calculated and reported using two-tailed methods with the assistance a statistical program from IBM, SPSS 24 for Microsoft© Windows version 10.

## Patient and Public Involvement

Patients were not involved in the development or design of this pilot study. However we do plan to enlist patient help when disseminating our research findings. We aim to include patient involvement when designing subsequent studies involving OXIVCT.

## RESULTS

### Descriptive information

Over a four-month period, 20 participants (10:10, male: female) deemed suitable candidates for spinal procedures were recruited into the study. The mean age of participants was 56 years ( $SD = 16.26$ ), range 27 years to 81years. Participant demographics can be seen in Table 1.

### Patient satisfaction

The mean patient satisfaction score (CSQ-8) was 30.2 out of a maximum 32, indicative of high patient satisfaction. The CSQ-8 scores by gender and age can be seen in Table .2.



1  
2  
3 A two-way between groups analysis of variance was conducted to explore the impact of  
4 gender and age on patient satisfaction levels, as measured by the CSQ-8 scale.

5  
6 Participants were divided into five groups depending on their age ( Group 1: 25-34 years,  
7 Group 2: 45-54 years, Group 3: 55-64 years, Group 4: 65-74 years and Group 5: 75-99 years)

8  
9 The interaction effect between gender and age was not statistically significant .

10  
11 High patient satisfaction levels were reported across a broad range of spinal procedures, seen  
12 in Table.3. These ranged from spinal nerve root blocks to complex deformity correction  
13 surgery.  
14  
15

16  
17 The CSQ-8 responses generated several significant trends, a strong positive relationship  
18 between meeting patients 'preoperative consenting needs and helping them to deal more  
19 effectively with their preoperative concerns was reported ( $p=.028$ ), with 80 % reporting that  
20 the tool helped a great deal. All participants reported that they would recommend the video  
21 consent tool to others preparing for surgery. When asked "if future treatment were required,  
22 would you use the service again?", all participants said yes. A significant positive  
23 relationship between the quality of the service participants received versus the service they  
24 expected was observed ( $p = 0.008$ ).  
25  
26  
27  
28  
29  
30  
31

### 32 **Engagement with the tool**

33  
34 All participants watched their consent video at least once prior to consenting for surgery, with  
35 a mean number of viewings of 2-3 times. Eighty-five percent of the participants watched  
36 their consent video with family and friends. Two participants sent their consent videos to  
37 their children, who lived in the USA and Australia. 15% of participants reported watching  
38 their video alone. Those who watched the video 4 to 5 times on average reported higher  
39 satisfaction scores. Approximately 13 additional minutes were required compared to the  
40 traditional process to complete the video recording process The mean recording time was 13  
41 minutes and 15 seconds, with a range of 6 minutes and 21 seconds, to 20 minutes and 55  
42 seconds. Introduction of the video consent tool did not endure any significant costs as the  
43 technology already existed within the Trust.  
44  
45  
46  
47  
48  
49  
50  
51

### 52 **DISCUSSION**

53  
54 The main findings of our study were that participants were overall 100% satisfied with the  
55 tool and the service. All patients reported that that would use the service again, if needed and  
56 100% of participants reported that would recommend the service to others requiring surgery.  
57  
58  
59  
60

1  
2  
3 The mean CSQ-8 satisfaction score reported in this study was 30.2, with scores above 24  
4 considered as achieving high levels of satisfaction (21) Compared to previous studies  
5 examining multimedia consent processes (17, 23), the personalised consent tool used in the  
6 present study is equal to, if not more effective than, the existing methods.  
7  
8

9  
10 Our preliminary results suggest that participants' age or gender did not affect patient  
11 satisfaction levels with the use of the video consent tool in the preoperative setting. This  
12 finding is consistent with studies (12, 24, 25). Busy preoperative clinics, poor communication  
13 techniques, unanswered questions, anxiety and poor comprehension are all barrier to patients  
14 not retaining information (26).  
15

16  
17 Our study has shown that the use of personalised video tool can allow patients to process and  
18 review complex information previously discussed by the surgeon, from the comfort of their  
19 own home. Participants, had the opportunity to email the spinal service for further clarity of  
20 the video content, two participants utilised this service.  
21  
22

23  
24  
25  
26  
27 Introduction of the video consent tool did not require significantly more clinician time. The  
28 ability to watch the video with family members, or even to securely send family members the  
29 video, allowed for shared decision making and aided a person-centred approach to care,  
30 empowering participants to manage their own medical information. This is important for  
31 patients outcomes as shared decision making facilitates increased patient satisfaction levels  
32 (27, 28). All patients engaged with their personalised consent adjunct twice on average before  
33 consenting to surgery. To our knowledge, multiple interactions of a consent adjunct have not  
34 been reported in the literature (29). This project found that, the more times participants  
35 watched their consent video the more satisfied they became with their consent process. With  
36 the highest satisfaction scores in those who engaged with the video tool the most (4 to 5  
37 times). Moreover, as the majority of studies using multimedia tools as an adjunct to informed  
38 consent do not personalise their content (27, 29), This is the first time that the use of a  
39 personalised multimedia tool has been reported in the literature. Due to the relative ease in  
40 setting up the pilot, other surgical disciplines within the trust have expressed interest in  
41 rolling out OXIVCT across their departments.  
42  
43  
44  
45  
46  
47  
48  
49  
50  
51  
52  
53

## 54 55 **CLINICAL IMPLICATIONS**

56 This study demonstrates that a personalised video consent tool is feasible to administer during  
57 the preoperative consent process for spinal surgery procedures and that the intervention  
58 produced high satisfaction scores. Overall, we found approximately thirteen additional minutes  
59  
60

1  
2  
3 were required compared to the traditional process to complete the video recording process.  
4  
5 This indicates that this procedure would be acceptable for use. Introducing OXIVCT into  
6  
7 clinical practice has numerous benefits such as, documentary evidence of the clinician – patient  
8  
9 consent conservation, which may reduce medicolegal cases associated informed consent.

10 It can be used as an educational tool for undergraduate medical teaching and could acts as a  
11  
12 patient resource / decision aid, useful when analysing potential benefits and risks associated  
13  
14 with surgery.

15  
16  
17 While concerns over additional time, potential costs and practicality as to achieving this  
18  
19 process are valid, we have found them not to be a significant barrier to delivering this service.  
20  
21 Providing one has access to a digital recording device such as a smartphone that can transfer  
22  
23 and store data securely, then the process is relatively simple. We recognise that patients need  
24  
25 to have access to the internet and may require help if not familiar using this sort of technology;  
26  
27 however, as 85% of UK adults have a smartphone (30) and access to the internet in this is not  
28  
29 an insurmountable barrier. While we have not undertaken a cost analysis, for this pilot there  
30  
31 have been no significant costs as the technology already exists within the NHS Trust. We would  
32  
33 therefore recommend video consenting as a new bench mark in the consenting process. Based  
34  
35 on this study, we recommend a randomised controlled trial and evaluate the full impact of this  
36  
37 process on outcome measures such as information retention, length of stay and litigation  
38  
39 claims.

## 40 **FUTURE RESEARCH**

41 The findings from this pilot provide a foundation for potential future research projects.  
42  
43 A larger more diverse sample size to include younger (kids/teens) and older (75yrs +) people  
44  
45 could add to the validity. There has been interest from other departments, further research  
46  
47 could look at its utility in other surgical disciplines. Phase 2 of this pilot study has led to the  
48  
49 development of a randomised controlled study to further evaluate the effects of OXIVCT on  
50  
51 patients' retention of information, pre and postoperative anxiety, PROMS and length of stay.

## 52 **CONCLUSION**

53  
54  
55 If patient satisfaction is a measure of quality (31) this study shows that the introduction of a  
56  
57 personalised consent tool can have positive impact on the quality of service patients receive.  
58  
59 The provision of informed care can be facilitated by the introduction of a personalised video  
60

1  
2  
3 tool, as it promotes patient autonomy, shared decision making and empowers patients to  
4 manage their own health.  
5  
6

7  
8 **AUTHOR CONTRIBUTIONS:**  
9

10 GM, CT and JR made substantial contributions to the conception of the study. GM analysed  
11 and interpreted the data for the study. GM, CT, DR and JR drafted the article and revised it  
12 critically for important intellectual content. JR, gave final approval of the version to be  
13 published and agreed to be accountable for all aspects of the article in ensuring that questions  
14 related to the accuracy or integrity of any part of the article are appropriately investigated and  
15 resolved. GM, JR and DR contributed to acquisition of the data.  
16  
17  
18  
19  
20  
21

22 **Funding:** This research received no specific grant from any funding agency.  
23

24 **Competing interests:** None  
25

26 **Disclaimer:** This study has been presented via podium presentation at the 41<sup>st</sup> Annual  
27 Scientific Meeting of the Singapore Orthopaedic Association and at the Joint British  
28 Scoliosis Society / Irish Spine Society Meeting, 2018.  
29

30 **Patient consent:** Obtained  
31

32 **Ethics approval:** Oxford Brookes University, Faculty of Health Sciences Research Ethics  
33 Committee (FREC2016/57).  
34  
35

36 **Data sharing statement:** We welcome data-sharing requests from researchers interested in  
37 OXIVCT. Please contact GM ([gerard.mawhinney@ouh.nhs.uk](mailto:gerard.mawhinney@ouh.nhs.uk)) directly to explore further.  
38

39 **Acknowledgements:** The authors would like to acknowledge the support received from the  
40 spinal surgery department throughout the pilot and thank those who volunteered to take part  
41 in the study.  
42  
43  
44  
45  
46  
47

48 **WORD COUNT:** 2808  
49  
50  
51  
52  
53  
54  
55  
56  
57  
58  
59  
60

1  
2  
3  
4  
5  
6  
7  
8 **TABLES**  
9

10 Table.1. Demographics of Study Participants  
11

12

| Demographic                        |                      | N (%)    |
|------------------------------------|----------------------|----------|
| Gender                             | Male                 | 10 (50%) |
|                                    | Female               | 10 (50%) |
|                                    | Mean age             | 56       |
|                                    | Range                | 27 -81   |
| Participant Age (years)            | 25 - 34              | 2 (10%)  |
|                                    | 35 – 44              | 0 (0%)   |
|                                    | 45 – 54              | 6 (30%)  |
|                                    | 55 – 64              | 5 (25%)  |
|                                    | 65 – 74              | 4 (20%)  |
|                                    | 75 – 99              | 3 (15%)  |
| Frequency of viewing consent video | Once                 | 7 (35%)  |
|                                    | 2 to 3 times         | 10 (50%) |
|                                    | 4 to 5 times         | 3 (15%)  |
| Video watched (with)               | Alone                | 3 (15%)  |
|                                    | Next of Kin          | 11(55%)  |
|                                    | Children             | 2 (10%)  |
|                                    | Other family members | 6 (30%)  |
|                                    | Friends              | 2 (10%)  |

13  
14  
15  
16  
17  
18  
19  
20  
21  
22  
23  
24  
25  
26  
27  
28  
29  
30  
31  
32  
33  
34  
35  
36  
37  
38  
39  
40  
41  
42  
43  
44  
45  
46  
47  
48  
49  
50  
51  
52  
53  
54  
55  
56  
57  
58  
59  
60

Table. 2. Mean CSQ-8 Scores by Age and Gender

| Demographic             | Mean CSQ-8 Score<br>(Maximum score 32) | Range ( <i>SD</i> ) |
|-------------------------|----------------------------------------|---------------------|
| Gender                  |                                        |                     |
| Male                    | 30                                     | 26 – 32 (2.2)       |
| Female                  | 30.4                                   | 29 – 32 ( 1.07)     |
| Total Mean              | 30.2                                   | 26 – 32 (1.70)      |
| Participant Age (years) |                                        |                     |
| 25 - 34                 | 31                                     | 30 – 32             |
| 35 - 44                 | -                                      | -                   |
| 45 – 54                 | 30.16                                  | 26 - 31             |
| 55 – 64                 | 29                                     | 26 – 31             |
| 65 – 74                 | 30.25                                  | 28 – 32             |
| 75 – 99                 | 31.66                                  | 31 – 32             |

Table.3. Overview of consented surgical procedures

| Variety of Surgical Procedures | N = 20 |
|--------------------------------|--------|
| Deformity correction           | 3      |
| Lumbar degenerative            | 6      |
| Nerve root block               | 3      |
| Removal of metalwork           | 1      |
| Tumour surgery                 | 7      |

## References

1. Montgomery v Lanarkshire Health Board Scotland. UKSC 11; 2015.
2. Bolam v Friern Hospital Management Committee. 1: WLR 583; 1957.
3. Sidaway v Board of Governors of the Bethlem Royal Hospital. 1: All ER 643; 1985.
4. De Freitas v O'Brien. P.I.Q.R. P281; 1995.
5. Bolitho (Deceased) v City & Hackney HA. P.I.Q.R. P334; 1997.
6. Herring. J FKMW, Dunn. M, Handa. A.I. Elbow room for best practice? Montgomery, patients' values, and balanced decision-making in person-centred clinical care. Medical Law Review. 2017;0(0):1-22.
7. Powell. J.M.R.A, Foy. M, Casey. A, Dabke. H, Gibson. A, Hutton. M. The 'three-legged stool' - A system for spinal informed consent. Bone Joint J. 2016;98:427-30.
8. Saigal R, Clark, A.J. Scheer, J.K. Smith, J.S. Bess, S. Mummaneni, P.V. McCarthy, I.M. Hart, R.A. Kebaish, K.M. Klineberg, R. Deviren, V. Schwab, F. Shaffrey. C, Ames. C. . Adult Spinal Deformity Patients Recall Fewer Than 50% of the Risks Discussed in the Informed Consent Process Preoperatively and the Recall Rate Worsens Significantly in the Postoperative Period. SPINE. 2015;40:1079-85.
9. Grady. C CS, Rowbotham. M.C, McConnell. M.V, Ashley. E.A, Kang. G. 'Informed Consent'. New England Journal of Medicine. 2017;376:856-67.
10. Rowbotham MCA, J. Greene, K. Cummings, S.R. . Interactive Informed Consent: Randomised Comparison with Paper Consents. PLOS One. 2013;8(3):e58603.
11. McConnell MVSA, Pavlovic. A, Homburger, T. et al. . Feasibility of obtaining measures of lifestyle from a smartphone app: the My Heart Counts Cardiovascular Health Study. JAMA. 2017;2:67-76.
12. Batuyong. E.D JAJL, Wickramasinghe. N, Beischer, A. Using multimedia to enhance the consent process for bunion correction surgery. ANZ J Surgery. 2014;84:249-54.
13. Briggs MW, C. Aprajay, G. 'Digital multimedia books produced using iBook Author for preoperative surgical patient information. Journal of Visual Communication in Medicine. 2014;37(3):59-64.
14. Bowers NE, E. Montbriand, J. Jaskolka, J. Roche-Nagle, G. Using a multimedia presentation to improve patient understanding and satisfaction with informed consent for minimally invasive vascular procedures. The Surgeon, Journal of the Royal Colleges of Surgeons of Edinburgh & Ireland. 2015;17(7-11).
15. Tipotsch-Maca. S VR, Ginzl. C, Vecsei-Mrlovits. P. Effect of Multimedia-assisted informed consent procedure on the information gain, satisfaction, and anxiety of cataract surgery patients. Journal of Cataract Reflective Surgery. 2016;42:110-6.
16. Eggers. C OR, Koerfer. A, Thomas. W, Koele. K, Hoelscher. A, Bollschweiler. E. A Multimedia Tool for the Informed Consent of Patients prior to Gastic Banding. Obesity. 2007;15(11):2866-73.
17. Winter. M KJ, Nalavenkata. S, Hardy. E, Handmer. M, Ainsworth. H, Lee. W.G, Louie-Johnsun. M. The use of portable video media vs standard verbal communication in the urological consent process: a multicentre, ransomised controlled , crossover trial. British Journal of Urology Int. 2016;118:823-8.
18. Nguyen TD, Attkisson CC, Stegner BL. Assessment of patient satisfaction: development and refinement of a service evaluation questionnaire. Eval Program Plann. 1983;6(3-4):299-313.

19. Attkisson CC, Zwick, R. . The client satisfaction questionnaire: Psychometric properties and correlations with service utilisation and psychotherapy outcome'. *Evaluation Program Planning*. 1983;5(3):233-7.
20. Larson DLA, C.C. Hargreaves, W.A, Nguyen, T.D. . Assessment of client / patient satisfaction: development and refinement of a service evaluation questionnaire. *Evaluation Program Planning*. 1979;6(3):299-313.
21. Nguyen TDA, C.C. Stegner, B.L. . Assessment of patient satisfaction: development and refinement of a service evaluation questionnaire. *Evaluation Program Planning*. 1983;6(4):299-313.
22. LLC TMS. CSQ Scales <http://www.csqscales.com/csq-translations.htm>2018 [Available from: <http://www.csqscales.com/csq-translations.htm>.
23. Sahai A, Kucheria R, Challacombe B, Dasgupta P. Video consent: a pilot study of informed consent in laparoscopic urology and its impact on patient satisfaction. *JLS*. 2006;10(1):21-5.
24. Bollschweiler EA, J. Obliers. R, Koerfer. A, Mönig. S, Metzger. R, Hölscher. H. Improving Informed Consent of Surgical Patients Using a Multimedia-Based Program? Results of a Prospective Randomised Multicentre Study of Patients Before Cholecystectomy. *Annals of Surgery*. 2008;248(2):205-11.
25. Gyomber D, Lawrentschuk, N, Wong, P, Parker, F, Bolton, D. Improving informed consent for patients undergoing radical prostatectomy using multimedia techniques: a prospective randomised crossover study. *BJU International*. 2010;106:1152-6.
26. Wang CA, P. Beischer, A. . The Use of Multimedia as an Adjunct to the Informed Consent Process for Morton's Neuroma Resection Surgery. *Foot & Ankle International*. 2014;35(10):1037-44.
27. Stacey DL, F. Lewis, K. Barry, M.J. Bennett, C.L, Eden. K.B, Holmes-Rover. M, Llewellyn-Thomas. H, Lydiatt. A, Trevena. L. Decision aids for people facing health treatment or screening decisions (Review). *Cochrane Database of Systematic Reviews*. 2017(4).
28. Hallock JLRR, Handa, V.L. . Patient satisfaction and informed consent for surgery. *American Journal of Obstetrics and Gynaecology*. 2017;181:e1-7.
29. Nehme JE-K, U, Chow, A, Hakky, S, Ahmend, A, Pirkayastha, S. The Use of Multimedia Consent Programs for Surgical Procedures: A Systematic Review. *Surgical Innovation*. 2013;20(1):13-23.
30. UK C. UK smartphone penetration continues to rise to 85% of adult population UK: Consultancy.uk; 2017 [Available from: <https://www.consultancy.uk/news/14113/uk-smartphone-penetration-continues-to-rise-to-85-of-adult-population>.
31. Sacks GDL, E.H. Dawes, A.J. Russell, M.M. Maggard-Gibbons, M. Zingmond, D.Z. Ko, C.Y. . Relationship Between Hospital Performance on a Patient Satisfaction Survey and Surgical Quality. *JAMA Surg*. 2015;150(9):858-64.



Figure.1. Summary of study procedure.

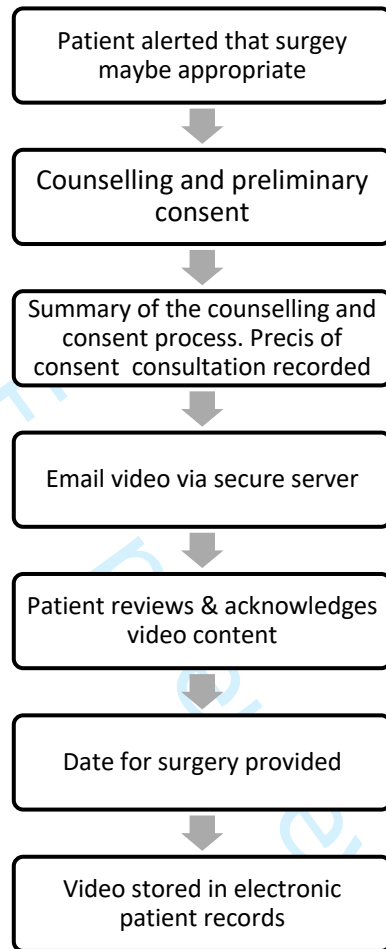

# BMJ Open

## THE OXFORD VIDEO INFORMED CONSENT TOOL (OXVIC): A PILOT STUDY OF INFORMED VIDEO CONSENT IN SPINAL SURGERY AND ITS IMPACTS ON PREOPERATIVE PATIENT SATISFACTION.

|                                 |                                                                                                                                                                                                                                                                                                                                                                                                                                                                                                                                                                                                  |
|---------------------------------|--------------------------------------------------------------------------------------------------------------------------------------------------------------------------------------------------------------------------------------------------------------------------------------------------------------------------------------------------------------------------------------------------------------------------------------------------------------------------------------------------------------------------------------------------------------------------------------------------|
| Journal:                        | <i>BMJ Open</i>                                                                                                                                                                                                                                                                                                                                                                                                                                                                                                                                                                                  |
| Manuscript ID                   | bmjopen-2018-027712.R1                                                                                                                                                                                                                                                                                                                                                                                                                                                                                                                                                                           |
| Article Type:                   | Research                                                                                                                                                                                                                                                                                                                                                                                                                                                                                                                                                                                         |
| Date Submitted by the Author:   | 18-Feb-2019                                                                                                                                                                                                                                                                                                                                                                                                                                                                                                                                                                                      |
| Complete List of Authors:       | Mawhinney, Gerard; Oxford University Hospitals NHS Foundation Trust Nuffield Orthopaedic Centre, Spinal Surgery; Nuffield Department of Clinical Medicine Division of Experimental Medicine, Thakar, Chrisan; Oxford University Hospitals NHS Foundation Trust Nuffield Orthopaedic Centre, Spinal Surgery<br>Williamson, Victoria; King's College London, Rothenfluh, Dominique; Oxford University Hospitals NHS Foundation Trust Nuffield Orthopaedic Centre, Spinal Surgery<br>Reynolds, Jeremy; Oxford University Hospitals NHS Foundation Trust Nuffield Orthopaedic Centre, Spinal Surgery |
| <b>Primary Subject Heading</b>: | Surgery                                                                                                                                                                                                                                                                                                                                                                                                                                                                                                                                                                                          |
| Secondary Subject Heading:      | Patient-centred medicine, Surgery                                                                                                                                                                                                                                                                                                                                                                                                                                                                                                                                                                |
| Keywords:                       | Video consent, Informed consent, Patient satisfaction, Spinal surgery                                                                                                                                                                                                                                                                                                                                                                                                                                                                                                                            |
|                                 |                                                                                                                                                                                                                                                                                                                                                                                                                                                                                                                                                                                                  |

SCHOLARONE™  
Manuscripts

1  
2  
3  
4  
5 THE OXFORD VIDEO INFORMED CONSENT TOOL (OXVIC): A PILOT STUDY  
6  
7 OF INFORMED VIDEO CONSENT IN SPINAL SURGERY AND ITS IMPACTS ON  
8  
9 PREOPERATIVE PATIENT SATISFACTION.  
10  
11  
12  
13  
14  
15

16 Gerard Mawhinney\*<sup>1,2</sup>, Chrishan Thakar<sup>1</sup>, Victoria Williamson<sup>3</sup>,  
17  
18 Dominique A. Rothenfluh<sup>1</sup> Jeremy Reynolds<sup>1</sup>  
19  
20  
21  
22

23 1: Oxford University Hospitals NHS Foundation Trust, Headley  
24 Way, Oxford, OX3 9DU, UK.  
25  
26

27 2: Experimental Medicine Division, Nuffield Department of  
28 Medicine, University of Oxford, John Radcliffe Hospital,  
29 Headley Way, Oxford, OX3 9DU, UK.  
30  
31  
32

33 3. Institute of Psychiatry, Psychology and Neuroscience  
34 (IOPPN), King's College London, 16 De Crespigny Park, London  
35 SE5 8AB  
36  
37  
38  
39  
40

41  
42  
43  
44  
45  
46 \*Corresponding Author: Mr. Gerard Mawhinney  
47

48 Corresponding Email: gerard.mawhinney@ouh.nhs.uk  
49  
50  
51  
52  
53  
54  
55  
56  
57  
58  
59  
60

1  
2  
3  
4  
5  
6  
7  
8  
9  
10  
11  
12  
13  
14  
15  
16  
17  
18  
19  
20  
21  
22  
23  
24  
25  
26  
27  
28  
29  
30  
31  
32  
33  
34  
35  
36  
37  
38  
39  
40  
41  
42  
43  
44  
45  
46  
47  
48  
49  
50  
51  
52  
53  
54  
55  
56  
57  
58  
59  
60

For peer review only

**ABSTRACT**

**Objectives:** The British Association of Spinal Surgeons (BASS) has recently called for updates in consenting practice. This study investigates the utility and acceptability of a personalised video consent tool to enhance patient satisfaction in the preoperative consent giving process.

**Design:** A single centre, prospective pilot study using questionnaires to assess acceptability of video consent and its impacts on preoperative patient satisfaction.

**Setting:** A single National Health Service (NHS) centre with individuals undergoing surgery at a regional spinal centre in the UK.

**Outcome measure:** As part of preoperative planning, a self-administered questionnaire regarding patient satisfaction with the use of a video consent tool as an adjunct to traditional consenting methods was completed.

**Participants:** 20 participants with a mean age of 56 years ( $SD = 16.26$ ) undergoing spinal surgery.

**Results:** Median number of video views were 2-3 times. 85% of patients watched the video with next of kin and family members.

1  
2  
3 80% of participants reported that the video consent tool helped  
4  
5 to their address preoperative concerns. All participants stated  
6  
7 they would use the video consent service again. All would  
8  
9 recommend the service to others requiring surgery. Implementing  
10  
11 the video consent tool did not endure any significant time or  
12  
13 costs.  
14  
15

16  
17  
18  
19 **Conclusions:** Introduction of a video consent tool was found to  
20  
21 be a positive adjunct to traditional consenting methods. Patient  
22  
23 - clinician consent dialogue can now be documented. A randomised  
24  
25 controlled study to further evaluate the effects of video  
26  
27 consent on patients' retention of information, pre and  
28  
29 postoperative anxiety, patient reported outcome measures as well  
30  
31 as length of stay may be beneficial.  
32  
33

34  
35  
36  
37 **Key Words:** Video consent, Informed consent, Patient  
38  
39 satisfaction, Spinal surgery.  
40  
41  
42  
43  
44  
45  
46  
47  
48  
49  
50  
51  
52  
53  
54  
55  
56  
57  
58  
59  
60

**ARTICLE SUMMARY**

- Development of a personalised video informed consent tool.
- A novel method to document the patient - clinician preoperative consent conversation.
- Prospective data gathered from self-administrated patient satisfaction questionnaires.
- Participants recruited, 10 male, 10 female, mean age of 56, all undergoing spinal surgery.
- An individualised consent adjunct used to promote patient autonomy and shared decision making.

## INTRODUCTION

Informed consent is a legal and ethical principle which is required prior to any intervention that may violate autonomy. The *Montgomery v Lanarkshire* judgement (1) initiated a change in how healthcare professionals obtain informed consent. *Montgomery* (1) confirms the shift from an already eroding paternalistic approach to consent set by *Bolam v Friem Hospital Management Committee*, (2), to the adoption and acknowledgment of a person-centred approach seen in *Sidaway v Bethlem Royal Hospital* (3), *De Freitas v O'Brien* (4) and *Bolitho v City & Hackney HA* (5). Others concur that *Montgomery* marked a decisive shift in the legal test of duty of care, from the perspective of the clinician to that of the patient (6).

Informed consent has gained accelerated momentum following the *Montgomery* judgement. In acknowledgement of the recent changes in consenting practice, the General Medical Council (GMC), the Royal College of Surgeons (RCS) and other professional organisations, such as The British Association of Spinal Surgeons (BASS), have issued best practice guidelines on obtaining informed consent (7). However, despite the release of updated guidelines there is currently a gap in consenting practice relating to documenting the preoperative consent conversation.



1  
2  
3           Preparing to undergo surgery can be a stressful event for  
4  
5 both patients and their families, often important information  
6  
7 discussed within the consent consultation is forgotten (8). By  
8  
9 providing patients access to a tool that captures their consent  
10  
11 conversation, it is thought that the video will provide patients  
12  
13 an opportunity to reflect and revisit the previously discussed  
14  
15 dialog, prior to consenting to treatment. It encourages a  
16  
17 bespoke individualised approach as indicated by Montgomery (1).  
18  
19 The addition of this step to the preoperative consenting process  
20  
21 may safeguard patients from medical coercion and promote  
22  
23 autonomy to make an informed decision about their care, while  
24  
25 reducing potential litigation claims.  
26  
27  
28  
29  
30  
31  
32  
33  
34

35 Enhancements in digital technology are driving changes in  
36  
37 information practices, which has influenced how informed consent  
38  
39 may be delivered (9), examples include the use of iPads to  
40  
41 deliver consent information (10) to the use of a smartphone  
42  
43 applications to assist informed consenting practice (11). The  
44  
45 acceptance of multimedia technology in preoperative consenting  
46  
47 has been demonstrated across a variety of surgical disciplines,  
48  
49 foot & ankle surgery (12), spinal surgery (13), vascular surgery  
50  
51 (14), ophthalmic surgery (15), gastrointestinal surgery (16) and  
52  
53 urological surgery (17). Notably, such preoperative multimedia  
54  
55 consent technologies are often generic and not patient specific.  
56  
57  
58  
59  
60 There is currently a lack of research regarding the use of

1  
2  
3 personalised multimedia consenting adjuncts within surgery.  
4  
5  
6  
7

8 In order to improve service delivery and comply with the  
9  
10 updated guidelines, we piloted a video consent tool (OxVIC) as  
11  
12 an adjunct to traditional consenting methods for patients  
13  
14 attending a spinal Preoperative Outpatient Assessment Clinic  
15  
16 (POAC). Each consent video contained indications for surgery,  
17  
18 associated risks and benefits, alternative treatment options  
19  
20 and a section for patients to ask questions or clarify points.  
21  
22

23 To our knowledge, the use of a video informed consent tool has  
24  
25 not been used before in spinal surgery.  
26  
27 Our study aims were to evaluate acceptability of a novel consent  
28  
29 tool (OxVIC), as an adjunct to traditional (written and verbal)  
30  
31 consenting methods. Provide documentary evidence of the patient  
32  
33 - clinician consent conversation, which now forms part of the  
34  
35 medical notes. Improve patient experience and enhance patient  
36  
37 satisfaction within the preoperative consent process, while  
38  
39 generating an evidence base for future research.  
40  
41  
42  
43  
44  
45  
46  
47  
48  
49

## 50 **METHODS**

51 Ethical approval for this project was obtained from the Health  
52  
53 and Life Sciences Faculty Research Ethics Committee (FREC)  
54  
55 Oxford Brookes University, Oxford, England (FREC2016/57). In  
56  
57 addition to the video consent process described below, written  
58  
59  
60

1  
2  
3 informed consent was additionally obtained from all  
4  
5 participants.  
6  
7  
8  
9

## 10 **Procedure**

11  
12 We conducted a single centre, non-randomised, non-  
13 comparative pilot study in patients undergoing a spinal  
14 procedure at an NHS spinal centre in the UK. A flowchart of the  
15 study procedure is outlined on Figure 1. Prior to consenting  
16 to take part, all patients received a Participant Information  
17 Sheet (PIS). The PIS outlined that if patients agreed to take  
18 part they would receive the "gold standard" (verbal and  
19 written) in consent information. In addition to this they would  
20 also receive a consent adjunct in the form of a personalised  
21 video. All participants who agreed to take part were consented  
22 by fellowship trained Consultant Spinal Surgeons using verbal  
23 and written consenting methods in addition to a summary of the  
24 consent consultation being recorded. A researcher, independent  
25 of the surgical team provided participants with patient  
26 information sheets prior to consenting. Participants were all  
27 informed that their participation was voluntary and they were  
28 free to withdraw at any time. The summary was conducted in a  
29 structured way and consisted of the following, a discussion  
30 around the patients reasoning for choosing surgery, followed by  
31 an overview of the surgical procedure, its intended benefits and  
32  
33  
34  
35  
36  
37  
38  
39  
40  
41  
42  
43  
44  
45  
46  
47  
48  
49  
50  
51  
52  
53  
54  
55  
56  
57  
58  
59  
60

1  
2  
3 associated risks ending with an opportunity for the patients'  
4  
5 to check their understanding by asking questions.  
6  
7

8 A password protected email and a hospital trust approved  
9  
10 web transfer service was used to send the personalised consent  
11  
12 videos to study participants. Participants reviewed their  
13  
14 personalised consent consultations at home with their family or  
15  
16 friends. Participants had the option to forward their personal  
17  
18 consent videos to family members outside of the UK. All,  
19  
20 participants were invited to contact the spinal team, to seek  
21  
22 clarity or ask further questions regarding the video content  
23  
24 (two participants utilised this service). The recorded consent  
25  
26 was stored securely within the patient's electronic health  
27  
28 records, accessible only to the research team. Participants were  
29  
30 asked to contact the spinal team once they had reviewed the  
31  
32 consent conversation, acknowledging the risks and benefits of  
33  
34 the proposed treatment. Prospective data from patients was  
35  
36 obtained using a self-administered questionnaire regarding  
37  
38 patient satisfaction with the use of a video consent tool as an  
39  
40 adjunct to traditional consenting methods. Participants were  
41  
42 invited to complete the measure following the consent  
43  
44 consultation and after reviewing their personalised consent  
45  
46 video.  
47  
48  
49  
50  
51

## 52 **Participants**

53  
54  
55 Participants were recruited over a four month period  
56  
57 (September to December 2017).  
58  
59  
60

1  
2  
3 Twenty two people were approached to take part, two declined,  
4  
5 twenty volunteered. (n=20). Participants did not receive a  
6  
7 honorarium for taking part in the study. Study inclusion  
8  
9 criteria were: all participants must be over the age of 18  
10  
11 years of age and have capacity to make informed decisions.  
12  
13 Participants were also required to have an active email  
14  
15 address with access to the internet. Participants were  
16  
17 excluded from the study if they lacked capacity to make  
18  
19 informed decisions or if they had any visual or hearing  
20  
21 impairments which may inhibit their ability to review their  
22  
23 consent video.  
24  
25  
26  
27  
28  
29  
30  
31  
32  
33  
34  
35  
36  
37  
38  
39

### 40 **Assessments**

41  
42 Electronic Self-Administered Questionnaires (SAQ) were  
43  
44 distributed via email to patients who agreed to partake in the  
45  
46 study by a researcher independent of the surgical team. Data  
47  
48 were collected at one point, post consent consultation.  
49  
50 Participant demographics, which included gender, age, number of  
51  
52 times the video consent tool was viewed and who they watched the  
53  
54 video with, were collected. In addition to this, participants  
55  
56 completed the validated CSQ-8 tool (18) online. The CSQ-8  
57  
58 consists of eight self-report questions, each constructed with  
59  
60

1  
2  
3 a four point Likert scale reply. The minimum achievable  
4 satisfaction score is 8, indicating poor satisfaction, a maximum  
5 score of 32 would indicate high levels of satisfaction (19, 20).  
6  
7 The CSQ-8 tool has been extensively tested for reliability and  
8 validity (19-21), to date it has been translated into more than  
9  
10 30 languages since its first launch in the early 1980's (22).  
11  
12 The CSQ-8 has been found to be acceptable for use in previous  
13 studies examining patient satisfaction with consenting methods  
14  
15 (17, 23).  
16  
17  
18  
19  
20  
21  
22  
23  
24  
25

### 26 **Data analysis**

27  
28 The data collection period finished once 20 completed  
29 SAQ's were received. Normality of data were assessed using a  
30 Kolmogorov-Smirnov test. Descriptive, bivariate and  
31  
32 inferential statistics were calculated and reported using two-  
33  
34 tailed methods with the assistance a statistical program from  
35  
36 IBM, SPSS 24 for Microsoft© Windows version 10.  
37  
38  
39  
40  
41  
42  
43

### 44 **Patient and Public Involvement**

45  
46 Patients were not involved in the development or design  
47 of this pilot study. However we do plan to enlist patient help  
48 when disseminating our research findings. We aim to include  
49  
50 patient involvement when designing subsequent studies  
51  
52 involving the Oxford Video Informed Consent tool (OxVIC).  
53  
54  
55  
56  
57  
58  
59  
60

## RESULTS

### Descriptive information

Over a four-month period, 20 participants (10:10, male:female) deemed suitable candidates for spinal procedures were recruited into the study. The mean age of participants was 56 years ( $SD = 16.26$ ), range 27 years to 81years. Participant demographics can be seen in Table 1.

### Patient satisfaction

CSQ-8 data were normally distributed. The mean patient satisfaction score (CSQ-8) was 30.2 out of a maximum 32, indicative of high patient satisfaction. The CSQ-8 scores by gender and age can be seen in Table .2.

A two-way between groups analysis of variance was conducted to explore the impact of gender and age on patient satisfaction levels, as measured by the CSQ-8 scale. Participants were divided into five groups depending on their age ( Group 1: 25-34 years, Group 2: 45-54 years, Group 3: 55-64 years, Group 4: 65-74 years and Group 5: 75-99 years) The interaction effect between gender and age was not statistically significant . High patient satisfaction levels were reported across a broad range of spinal procedures, seen in Table1. These ranged from spinal nerve root blocks to complex deformity correction surgery.

1  
2  
3 The CSQ-8 responses generated several significant trends,  
4 a strong positive relationship between meeting patients  
5 'preoperative consenting needs and helping them to deal more  
6 effectively with their preoperative concerns was reported  
7 (p=0.028), with 80 % reporting that the tool helped a great  
8 deal. All participants reported that they would recommend the  
9 video consent tool to others preparing for surgery.  
10 When asked "if future treatment were required, would you use  
11 the service again?", all participants responded yes. A  
12 significant positive relationship between the quality of the  
13 service participants received versus the service they expected  
14 was observed ( $p = 0.008$ ).

### 31 32 **Engagement with the tool**

33 All participants watched their consent video at least  
34 once prior to consenting for surgery, with a mean number of  
35 viewings of 2-3 times. Eighty-five percent of the participants  
36 watched their consent video with their next of kin, which  
37 includes partners and other family members, their children or  
38 friends. Two participants sent their consent videos to their  
39 children, who lived in the USA and Australia. 15% of  
40 participants reported watching their video alone. Those who  
41 watched the video 4 to 5 times on average reported higher  
42 satisfaction scores. Approximately 13 additional minutes were  
43 required compared to the traditional process to complete the  
44 video recording process.



1  
2  
3 The mean recording time was 13 minutes and 15 seconds, with a  
4 range of 6 minutes and 21 seconds, to 20 minutes and 55  
5 seconds. Introduction of the video consent tool did not endure  
6 any significant costs as the technology already existed within  
7 the Trust.  
8  
9  
10  
11  
12  
13  
14  
15  
16

## 17 **DISCUSSION**

18  
19 The main findings of our study were that participants  
20 were overall completely satisfied with the video consent tool  
21 and the service. All patients reported that that would use the  
22 service again if needed and that they would recommend the  
23 service to others requiring surgery.  
24  
25  
26  
27  
28  
29

30 The mean CSQ-8 satisfaction score reported in this study  
31 was 30.2, with scores above 24 considered as achieving high  
32 levels of satisfaction (21) While it was beyond the scope of  
33 this exploratory pilot study to examine to how the video  
34 consent tool compared to other methods of consent, such as  
35 audio recording of consent, participant scores on the CSQ-8 in  
36 the present study indicate that the personalised video consent  
37 tool may be equal to, if not more effective than, the existing  
38 methods (e.g. audio recording alone) (17, 23). However,  
39 additional research is needed to further explore this  
40 possibility. Our preliminary results suggest that  
41 participants' age or gender did not affect patient  
42 satisfaction levels with the use of the video consent tool in  
43  
44  
45  
46  
47  
48  
49  
50  
51  
52  
53  
54  
55  
56  
57  
58  
59  
60

1  
2  
3 the preoperative setting. This finding is consistent with  
4  
5 previous studies (12, 24, 25).  
6

7  
8 Busy preoperative clinics, poor communication techniques,  
9  
10 unanswered questions, anxiety and poor comprehension are all  
11  
12 barrier to patients not retaining information (26). Our study  
13  
14 indicates that the use of personalised video tool may allow  
15  
16 patients to process and review complex information previously  
17  
18 discussed by the surgeon, from the comfort of their own home.  
19  
20 Participants had the opportunity to email the spinal service  
21  
22 for further clarity of the video content and two participants  
23  
24 utilised this service.  
25  
26 Introduction of the video consent tool did not require  
27  
28 significantly more clinician time. The ability to watch the  
29  
30 video with family members, or even to securely send family  
31  
32 members the video, allowed for shared decision making and  
33  
34 aided a person-centred approach to care, empowering  
35  
36 participants to manage their own medical information. This is  
37  
38 important for patients outcomes as shared decision making  
39  
40 facilitates increased patient satisfaction levels and  
41  
42 potentially reduces illness uncertainty (27, 28).  
43  
44  
45  
46  
47

48 All patients engaged with their personalised consent  
49  
50 adjunct twice on average before consenting to surgery. To our  
51  
52 knowledge, multiple interactions of a preoperative consent  
53  
54 adjunct have not been reported in the literature (29). All  
55  
56 patients were happy to recommend OxVIC to others requiring  
57  
58 preoperative surgical consent, indicating they were satisfied  
59  
60

1  
2  
3 and it would be acceptable for further use. This project found  
4 that, the more times participants watched their consent video,  
5 the more satisfied they became with their consent process.  
6  
7  
8  
9  
10 With the highest satisfaction scores in those who engaged with  
11 the video tool the most (4 to 5 times). Moreover, as the  
12 majority of studies using multimedia tools as an adjunct to  
13 informed consent do not personalise their content (27, 29),  
14 this is the first time that the use of a personalised  
15 multimedia tool has been reported in the literature.  
16  
17  
18  
19  
20  
21  
22  
23  
24  
25

### 26 **Clinical implications**

27  
28 This study indicates that a personalised video consent tool is  
29 feasible to administer during the preoperative consent process  
30 for spinal surgery procedures and that the intervention  
31 produced high satisfaction scores. Overall, we found  
32 approximately thirteen additional minutes were required  
33 compared to the traditional process to complete the video  
34 recording process. This suggests that this procedure would be  
35 acceptable for use. Particularly in complex consultations  
36 where decision-making and communication might be more  
37 challenging for both the clinician and the patient.  
38  
39 While concerns over additional time, potential costs and  
40 practicality as to achieving this process are valid, we found  
41 them not to be a significant barrier to delivering this service.  
42  
43 Provided one has access to a good quality digital recording  
44  
45  
46  
47  
48  
49  
50  
51  
52  
53  
54  
55  
56  
57  
58  
59  
60

1  
2  
3 device, such as a smartphone that can transfer and store data  
4  
5 securely, then the process can be straightforward.  
6

7  
8 We recognise that patients need to have access to the internet  
9  
10 and may require help if not familiar using this sort of  
11  
12 technology; however, as 85% of UK adults have a smartphone (30)  
13  
14 and access to the internet in this is not an insurmountable  
15  
16 barrier. While we have not undertaken a cost analysis, for this  
17  
18 pilot there have been no significant costs as the technology  
19  
20 already exists within the NHS Trust.  
21  
22

23  
24 Introducing OxVIC into clinical practice has numerous benefits  
25  
26 such as, documentary evidence of the clinician - patient consent  
27  
28 conservation, which may reduce medicolegal cases. It may be used  
29  
30 as an educational tool for medical teaching and could act as a  
31  
32 patient resource / decision aid, useful when analysing potential  
33  
34 benefits and risks associated with surgery.  
35  
36  
37  
38

39  
40 We would therefore suggest video consenting as a new bench mark  
41  
42 in the consenting process. Based on this study, we recommend a  
43  
44 randomised controlled trial to evaluate the full impact of this  
45  
46 process on outcome measures such as information retention,  
47  
48 length of stay and litigation claims.  
49  
50  
51  
52

### 53 **Strengths and limitations**

54  
55 This study has several strengths and weaknesses. Among the  
56  
57 strengths was the development of a novel method to document the  
58  
59 patient - clinician consent conversation. To our knowledge, this  
60

1  
2  
3 study is the first of its kind to provide preoperative patients  
4 with a personalised multimedia consent adjunct (OxVIC).  
5  
6 Furthermore, OxVIC allows patients to review their consent  
7  
8 conversation with family members and friends away from the  
9  
10 clinical area, promoting shared decision making and patient  
11  
12 autonomy. Among the weaknesses is the limited diversity of the  
13  
14 sample (e.g. spinal surgery patients). Further studies could  
15  
16 include the patient perspectives from other surgical  
17  
18 specialities. In addition, quantitative data gathered within  
19  
20 this pilot could be supported by the addition of qualitative  
21  
22 research methods. While a standard NHS/Trust surgical consent  
23  
24 form was used to promote surgeon adherence to standard  
25  
26 information giving, the consent videos were not independently  
27  
28 reviewed for validation purposes prior to patient access. The  
29  
30 potential for standardisation should be considered in future  
31  
32 studies of multimedia consenting. Finally, concerns regarding  
33  
34 cost and additional consenting time could be perceived as a  
35  
36 potential limitation. However, the ability to document the  
37  
38 patient-clinical conversation and its potential application to  
39  
40 medio-legal practice may outweigh such concerns. This needs to  
41  
42 be considered in future feasibility studies.  
43  
44  
45  
46  
47  
48  
49  
50  
51  
52  
53  
54  
55  
56

### 57 **Future research**

58  
59  
60

1  
2  
3 The findings from this pilot provide a foundation for potential  
4 future research projects.  
5  
6

7 A larger more diverse sample size to include younger (<25  
8 years) and older (75yrs +) people could add to the validity.  
9  
10 Moreover, there is scope for the tool to be included in other  
11 specialities and further research should examine the  
12 acceptability of video consenting tool in multiple surgical  
13 disciplines. A double blinded, randomised control trial to  
14 definitively test the efficacy of OxVIC across different  
15 surgical specialities is in process.  
16  
17  
18  
19  
20  
21  
22  
23  
24  
25  
26  
27  
28  
29

### 30 **Conclusion**

31  
32 If patient satisfaction is a measure of quality (31) this  
33 study indicates that the introduction of a personalised consent  
34 tool may have a positive impact on the quality of service  
35 patients receive. The provision of informed care could be  
36 facilitated by the introduction of a personalised video tool,  
37 as it promotes patient autonomy, shared decision making and  
38 empowers patients to manage their own health.  
39  
40  
41  
42  
43  
44  
45  
46  
47  
48  
49  
50  
51  
52  
53  
54  
55  
56  
57  
58  
59  
60

**AUTHOR CONTRIBUTIONS:**

GM, CT and JR made substantial contributions to the conception of the study. GM analysed and interpreted the data for the study. GM, JR and DR contributed to acquisition of the data. GM, CT, VW, DR and JR drafted the article and revised it critically for important intellectual content. All authors gave final approval of the version to be published and agreed to be accountable for all aspects of the article in ensuring that questions related to the accuracy or integrity of any part of the article are appropriately investigated and resolved.

**Funding:** This research received no specific grant from any funding agency.

**Competing interests:** None

**Disclaimer:** This study has been presented via podium presentation at the 41<sup>st</sup> Annual Scientific Meeting of the Singapore Orthopaedic Association and at the Joint British Scoliosis Society / Irish Spine Society Meeting, 2018.

**Patient consent:** Obtained

**Ethics approval:** Oxford Brookes University, Faculty of Health Sciences Research Ethics Committee (FREC2016/57).

**Data sharing statement:** We welcome data-sharing requests from researchers interested in OxVIC. Please contact GM ([gerard.mawhinney@ouh.nhs.uk](mailto:gerard.mawhinney@ouh.nhs.uk)) directly to explore further.

**Acknowledgements:** The authors would like to acknowledge the support received from the spinal surgery department throughout the pilot and thank those who volunteered to take part in the study.

**WORD COUNT:** 3155

**Table.1. Demographics of Study Participants**

|                                           |         | Sample     |
|-------------------------------------------|---------|------------|
| Demographics                              |         | statistics |
| Gender, N(%)                              | Male    | 10 (50%)   |
|                                           | Female  | 10 (50%)   |
| Participant age (years) <i>SD</i> =       |         |            |
| 16.26                                     | 25 – 34 | 2 (10%)    |
| Mean age – 56 years                       | 35 – 44 | 0 (0%)     |
|                                           | 45 – 54 | 6 (30%)    |
|                                           | 55 – 64 | 5 (25%)    |
|                                           | 65 – 74 | 4 (20%)    |
|                                           | 75 – 99 | 3 (15%)    |
| Range                                     | 27 – 81 |            |
|                                           |         | 3          |
| Deformity                                 |         | 6          |
| Variety of Surgical Procedures correction |         | 3          |



|                              |                  |          |
|------------------------------|------------------|----------|
|                              | Lumbar           | 1        |
|                              | degenerative     | 7        |
|                              | Nerve Root block |          |
|                              | Removal of       |          |
|                              | metalwork        |          |
|                              | Tumour surgery   |          |
| Frequency of viewing consent |                  |          |
| video                        | Once             | 7 (35%)  |
|                              | 2 to 3 times     | 10 (50%) |
|                              | 4 to 5 times     | 3 (15%)  |
| Video watched (with)         |                  |          |
|                              | Alone            | 3 (15%)  |
|                              | Next of Kin      | 11 (55%) |
|                              | Children         | 2 (10%)  |
|                              | Other family     |          |
|                              | members          | 6 (30%)  |
|                              | Friends          | 2 (10%)  |

Note. *SD* = standard deviation.

**Table. 2. Mean CSQ-8 Scores by Age and Gender**

| Demographic | Mean CSQ-8 Score | (Maximum score Range ( <i>SD</i> )) |
|-------------|------------------|-------------------------------------|
| Gender      |                  |                                     |
| Male        | 30               | 26 - 32 (2.2)                       |
| Female      | 30.4             | 29 - 32 ( 1.07)                     |

1  
2  
3 Total Mean 30.2 26 - 32 (1.70)  
4

5  
6 Participant Age (years)  
7

8 25 - 34 31 30 - 32  
9

10 35 - 44 - -  
11

12 45 - 54 30.16 26 - 31  
13

14 55 - 64 29 26 - 31  
15

16 65 - 74 30.25 28 - 32  
17

18 75 - 99 31.66 31 - 32  
19  
20  
21

22  
23  
24  
25  
26  
27  
28  
29  
30  
31  
32  
33  
34  
35  
36  
37  
38  
39  
40  
41  
42 Figure legend: Figure.1. Provides an overview of the Oxford  
43 Video Informed Consent Tool (OxVIC).  
44  
45  
46  
47  
48  
49  
50  
51  
52  
53  
54  
55  
56  
57  
58  
59  
60

1  
2  
3  
4  
5  
6  
7  
8  
9  
10  
11  
12  
13  
14  
15  
16  
17  
18  
19  
20  
21  
22  
23  
24  
25  
26  
27  
28  
29  
30  
31  
32  
33  
34  
35  
36  
37  
38  
39  
40  
41  
42  
43  
44  
45  
46  
47  
48  
49  
50  
51  
52  
53  
54  
55  
56  
57  
58  
59  
60

For peer review only

## References

1. Montgomery v Lanarkshire Health Board Scotland. UKSC 11; 2015.
2. Bolam v Friern Hospital Management Committee. 1: WLR 583; 1957.

- 1  
2  
3 3. Sidaway v Board of Governors of the Bethlem Royal Hospital.  
4  
5 1: All ER 643; 1985.  
6
- 7  
8 4. De Freitas v O'Brien. P.I.Q.R. P281; 1995.  
9
- 10 5. Bolitho (Deceased) v City & Hackney HA. P.I.Q.R. P334;  
11  
12 1997.  
13
- 14 6. Herring. J FKMW, Dunn. M, Handa. A.I. Elbow room for best  
15  
16 practice? Montgomery, patients' values, and balanced decision-  
17  
18 making in person-centred clinical care. Medical Law Review.  
19  
20 2017;0(0):1-22.  
21  
22
- 23 7. Powell. J.M RA, Foy. M, Casey. A, Dabke. H, Gibson. A,  
24  
25 Hutton. M. The 'three-legged stool' - A system for spinal  
26  
27 informed consent. Bone Joint J. 2016;98:427-30.  
28  
29
- 30 8. Saigal R, Clark, A.J. Scheer, J.K. Smith, J.S. Bess, S.  
31  
32 Mummaneni, P.V. McCarthy, I.M. Hart, R.A, Kebaish, K.M.  
33  
34 Klineberg, R. Deviren, V. Schwab, F. Shaffrey. C, Ames. C. .  
35  
36 Adult Spinal Deformity Patients Recall Fewer Than 50% of the  
37  
38 Risks Discussed in the Informed Consent Process Preoperatively  
39  
40 and the Recall Rate Worsens Significantly in the Postoperative  
41  
42 Period. SPINE. 2015;40:1079-85.  
43  
44
- 45 9. Grady. C CS, Rowbotham. M.C, McConnell. M.V, Ashley. E.A,  
46  
47 Kang. G. 'Informed Consent'. New England Journal of Medicine.  
48  
49 2017;376:856-67.  
50  
51
- 52 10. Rowbotham MCA, J. Greene, K. Cummings, S.R. . Interactive  
53  
54 Informed Consent: Randomised Comparison with Paper Consents.  
55  
56 PLOS One. 2013;8(3):e58603.  
57  
58  
59  
60

- 1  
2  
3 11. McConnell MVSA, Pavlovic. A, Homburger, T. et al. .  
4  
5 Feasibility of obtaining measures of lifestyle from a smartphone  
6  
7 app: the My Heart Counts Cardiovascular Health Study. JAMA.  
8  
9 2017;2:67-76.  
10  
11  
12 12. Batuyong. E.D JAJL, Wickramasinghe. N, Beischer, A. Using  
13  
14 multimedia to enhance the consent process for bunion correction  
15  
16 surgery. ANZ J Surgery. 2014;84:249-54.  
17  
18  
19 13. Briggs MW, C. Aprajay, G. 'Digital multimedia books  
20  
21 produced using iBook Author for preoperative surgical patient  
22  
23 information. Journal of Visual Communication in Medicine.  
24  
25 2014;37(3):59-64.  
26  
27  
28 14. Bowers NE, E. Montbriand, J. Jaskolka, J. Roche-Nagle, G.  
29  
30 Using a multimedia presentation to improve patient understanding  
31  
32 and satisfaction with informed consent for minimally invasive  
33  
34 vascular proceddures. The Surgeon, Journal of the Royal Colleges  
35  
36 of Surgeons of Edinburgh & Ireland. 2015;17(7-11).  
37  
38  
39 15. Tipotsch-Maca. S VR, Ginzel. C, Vecsei-Mrlovits. P. Effect  
40  
41 of Multimedia-assisted informed consent procedure on the  
42  
43 information gain, satisfaction, and anxiety of cataract surgery  
44  
45 patients. Journal of Cataract Reflective Surgery. 2016;42:110-  
46  
47  
48 6.  
49  
50  
51 16. Eggers. C OR, Koerfer. A, Thomas. W, Koele. K, Hoelscher.  
52  
53 A, Bollschweiler. E. A Multimedia Tool for the Informed Consent  
54  
55 of Patients prior to Gastic Banding. Obesity. 2007;15(11):2866-  
56  
57  
58 73.  
59  
60

- 1  
2  
3 17. Winter. M KJ, Nalavenkata. S, Hardy. E, Handmer. M,  
4 Ainsworth. H, Lee. W.G, Louie-Johnsun. M. The use of portable  
5 video media vs standard verbal communication in the urological  
6 consent process: a multicentre, randomised controlled ,  
7 crossover trial. British Journal of Urology Int. 2016;118:823-  
8 8.  
9  
10  
11  
12  
13  
14  
15  
16 18. Nguyen TD, Attkisson CC, Stegner BL. Assessment of patient  
17 satisfaction: development and refinement of a service evaluation  
18 questionnaire. Eval Program Plann. 1983;6(3-4):299-313.  
19  
20  
21  
22  
23 19. Attkisson CC, Zwick, R. . The client satisfaction  
24 questionnaire: Psychometric properties and correlations with  
25 service utilisation and psychotherapy outcome'. Evaluation  
26 Program Planning. 1983;5(3):233-7.  
27  
28  
29  
30  
31  
32 20. Larson DLA, C.C. Hargreaves, W.A, Nguyen, T.D. . Assessment  
33 of client / patient satisfaction: development and refinement of  
34 a service evaluation questionnaire. Evaluation Program Planning.  
35 1979;6(3):299-313.  
36  
37  
38  
39  
40  
41 21. Nguyen TDA, C.C. Stegner, B.L. . Assessment of patient  
42 satisfaction: development and refinement of a service evaluation  
43 questionnaire. Evaluation Program Planning. 1983;6(4):299-313.  
44  
45  
46  
47  
48 22. LLC TMS. CSQ Scales [http://www.csqscales.com/csq-](http://www.csqscales.com/csq-translations.htm)  
49 [translations.htm](http://www.csqscales.com/csq-translations.htm)2018 [Available from:  
50 <http://www.csqscales.com/csq-translations.htm>.  
51  
52  
53  
54  
55 23. Sahai A, Kucheria R, Challacombe B, Dasgupta P. Video  
56 consent: a pilot study of informed consent in laparoscopic  
57  
58  
59  
60

1  
2  
3 urology and its impact on patient satisfaction. JSLS.  
4  
5 2006;10(1):21-5.  
6

7  
8 24. Bollschweiler EA, J. Obliers. R, Koerfer. A, Mönig. S,  
9  
10 Metzger. R, Hölscher. H. Improving Informed Consent of Surgical  
11  
12 Patients Using a Multimedia-Based Program? Results of a  
13  
14 Prospective Randomised Multicentre Study of Patients Before  
15  
16 Cholecystectomy. Annals of Surgery. 2008;248(2):205-11.  
17

18  
19 25. Gyomber D, Lawrentschuk, N, Wong, P, Parker, F, Bolton, D.  
20  
21 Improving informed consent for patients undergoing radical  
22  
23 prostatectomy using multimedia techniques: a prospective  
24  
25 randomised crossover study. BJU International. 2010;106:1152-6.  
26

27  
28 26. Wang CA, P. Beischer, A. . The Use of Multimedia as an  
29  
30 Adjunct to the Informed Consent Process for Morton's Neuroma  
31  
32 Resection Surgery. Foot & Ankle International. 2014;35(10):1037-  
33  
34 44.  
35

36  
37 27. Stacey DL, F. Lewis, K. Barry, M.J. Bennett, C.L, Eden.  
38  
39 K.B, Holmes-Rover. M, Llewellyn-Thomas. H, Lydiatt. A, Trevena.  
40  
41 L. Decision aids for people facing health treatment or screening  
42  
43 decisions (Review). Cochrane Database of Systematic Reviews.  
44  
45 2017(4).  
46

47  
48 28. Hallock JLRR, Handa, V.L. . Patient satisfaction and  
49  
50 informed consent for surgery. American Journal of Obstetrics and  
51  
52 Gynaecology. 2017;181:e1-7.  
53

54  
55 29. Nehme JE-K, U, Chow, A, Hakky, S, Ahmend, A, Pirkayastha,  
56  
57 S. The Use of Multimedia Consent Programs for Surgical  
58  
59  
60

1  
2  
3 Procedures: A Systematic Review. Surgical Innovation.  
4  
5 2013;20(1):13-23.  
6

7  
8 30. UK C. UK smartphone penetration continues to rise to 85%  
9  
10 of adult population UK: Consultancy.uk; 2017 [Available from:  
11  
12 [https://www.consultancy.uk/news/14113/uk-smartphone-  
15  
16 penetration-continues-to-rise-to-85-of-adult-population](https://www.consultancy.uk/news/14113/uk-smartphone-<br/>13<br/>14 penetration-continues-to-rise-to-85-of-adult-population).  
17

18  
19 31. Sacks GDL, E.H. Dawes, A.J. Russell, M.M. Maggard-Gibbons,  
20  
21 M. Zingmond, D.Z. Ko, C.Y. . Relationship Between Hospital  
22  
23 Performance on a Patient Satisfaction Survey and Surgical  
24  
25 Quality. JAMA Surg. 2015;150(9):858-64.  
26  
27  
28  
29  
30  
31  
32  
33  
34  
35  
36  
37  
38  
39  
40  
41  
42  
43  
44  
45  
46  
47  
48  
49  
50  
51  
52  
53  
54  
55  
56  
57  
58  
59  
60



Figure.1. An overview of the Oxford Video Informed Consent Tool (OxVIC) process

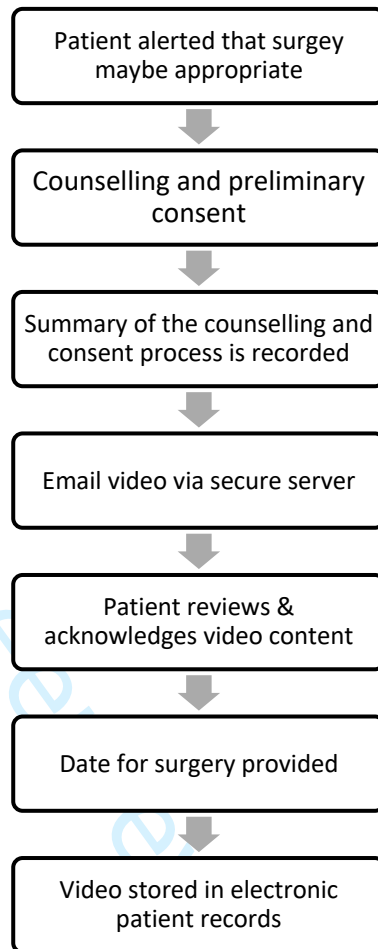

For peer review only

# BMJ Open

## THE OXFORD VIDEO INFORMED CONSENT TOOL (OXVIC): A PILOT STUDY OF INFORMED VIDEO CONSENT IN SPINAL SURGERY AND PREOPERATIVE PATIENT SATISFACTION.

|                                 |                                                                                                                                                                                                                                                                                                                                                                                                                                                                                                                                                                                             |
|---------------------------------|---------------------------------------------------------------------------------------------------------------------------------------------------------------------------------------------------------------------------------------------------------------------------------------------------------------------------------------------------------------------------------------------------------------------------------------------------------------------------------------------------------------------------------------------------------------------------------------------|
| Journal:                        | <i>BMJ Open</i>                                                                                                                                                                                                                                                                                                                                                                                                                                                                                                                                                                             |
| Manuscript ID                   | bmjopen-2018-027712.R2                                                                                                                                                                                                                                                                                                                                                                                                                                                                                                                                                                      |
| Article Type:                   | Research                                                                                                                                                                                                                                                                                                                                                                                                                                                                                                                                                                                    |
| Date Submitted by the Author:   | 12-Mar-2019                                                                                                                                                                                                                                                                                                                                                                                                                                                                                                                                                                                 |
| Complete List of Authors:       | Mawhinney, Gerard; Oxford University Hospitals NHS Foundation Trust Nuffield Orthopaedic Centre, Spinal Surgery; Nuffield Department of Clinical Medicine Division of Experimental Medicine, Thakar, Chrishan; Oxford University Hospitals NHS Foundation Trust Nuffield Orthopaedic Centre, Spinal Surgery Williamson, Victoria; King's College London, Rothenfluh, Dominique; Oxford University Hospitals NHS Foundation Trust Nuffield Orthopaedic Centre, Spinal Surgery Reynolds, Jeremy; Oxford University Hospitals NHS Foundation Trust Nuffield Orthopaedic Centre, Spinal Surgery |
| <b>Primary Subject Heading</b>: | Surgery                                                                                                                                                                                                                                                                                                                                                                                                                                                                                                                                                                                     |
| Secondary Subject Heading:      | Patient-centred medicine, Surgery                                                                                                                                                                                                                                                                                                                                                                                                                                                                                                                                                           |
| Keywords:                       | Video consent, Informed consent, Patient satisfaction, Spinal surgery                                                                                                                                                                                                                                                                                                                                                                                                                                                                                                                       |
|                                 |                                                                                                                                                                                                                                                                                                                                                                                                                                                                                                                                                                                             |

SCHOLARONE™  
Manuscripts

1  
2  
3  
4  
5  
6  
7 **THE OXFORD VIDEO INFORMED CONSENT TOOL (OXVIC): A PILOT STUDY OF**  
8  
9  
10 **INFORMED VIDEO CONSENT IN SPINAL SURGERY AND PREOPERATIVE**  
11  
12  
13  
14 **PATIENT SATISFACTION.**  
15  
16  
17  
18  
19  
20  
21  
22  
23

24 **Gerard Mawhinney\*<sup>1,2</sup>, Chrishan Thakar<sup>1</sup>, Victoria Williamson<sup>3</sup>, Dominique A.**  
25  
26

27 **Rothenfluh<sup>1</sup> Jeremy Reynolds<sup>1</sup>**  
28  
29  
30  
31  
32  
33

34  
35 **1: Oxford University Hospitals NHS Foundation Trust, Headley Way, Oxford, OX3**  
36  
37  
38 **9DU, UK.**  
39  
40

41  
42 **2: Experimental Medicine Division, Nuffield Department of Medicine, University of**  
43  
44  
45 **Oxford, John Radcliffe Hospital, Headley Way, Oxford, OX3 9DU, UK.**  
46  
47

48  
49 **3. Institute of Psychiatry, Psychology and Neuroscience (IOPPN), King's College**  
50  
51  
52 **London, 16 De Crespigny Park, London SE5 8AB**  
53  
54  
55  
56  
57  
58  
59  
60

1  
2  
3 **\*Corresponding Author: Mr. Gerard Mawhinney**  
4  
5  
6

7 **Corresponding Email: gerard.mawhinney@ouh.nhs.uk**  
8  
9  
10  
11  
12  
13  
14  
15  
16  
17  
18  
19  
20  
21  
22  
23  
24  
25  
26  
27  
28  
29  
30  
31  
32  
33  
34  
35  
36  
37  
38  
39  
40  
41  
42  
43  
44  
45  
46  
47  
48  
49  
50  
51  
52  
53  
54  
55  
56  
57  
58  
59  
60

For peer review only

## ABSTRACT

**Objectives:** The British Association of Spinal Surgeons recently called for updates in consenting practice. This study investigates the utility and acceptability of a personalised video consent tool to enhance patient satisfaction in the preoperative consent giving process.

**Design:** A single centre, prospective pilot study using questionnaires to assess acceptability of video consent and its impacts on preoperative patient satisfaction.

**Setting:** A single National Health Service (NHS) centre with individuals undergoing surgery at a regional spinal centre in the UK.

**Outcome measure:** As part of preoperative planning, study participants completed a self-administered questionnaire (CSQ-8), which measured their satisfaction with the use of a video consent tool as an adjunct to traditional consenting methods.

1  
2  
3  
4 **Participants:** 20 participants with a mean age of 56 years ( $SD = 16.26$ ) undergoing  
5  
6  
7 spinal surgery.  
8  
9

10  
11  
12  
13  
14 **Results:** Mean patient satisfaction (CSQ-8) score was 30.2 / 32. Median number of  
15  
16  
17 video views were 2-3 times. 85% of patients watched the video with family and friends.  
18  
19  
20  
21 80% of participants reported that the video consent tool helped to their address  
22  
23  
24 preoperative concerns. All participants stated they would use the video consent  
25  
26  
27 service again. All would recommend the service to others requiring surgery.  
28  
29  
30  
31 Implementing the video consent tool did not endure any significant time or costs.  
32  
33  
34  
35  
36  
37  
38  
39  
40  
41  
42  
43  
44  
45  
46  
47  
48  
49  
50  
51  
52  
53  
54  
55  
56  
57  
58  
59  
60

**Conclusions:** Introduction of a video consent tool was found to be a positive adjunct to  
traditional consenting methods. Patient – clinician consent dialogue can now be  
documented. A randomised controlled study to further evaluate the effects of video  
consent on patients' retention of information, pre and postoperative anxiety, patient  
reported outcome measures as well as length of stay may be beneficial.

**Key Words:** Video consent, Informed consent, Patient satisfaction, Spinal surgery.

## ARTICLE SUMMARY

### Strengths and limitations of this study

- The development of a personalised video consent tool used to promote patient autonomy and shared decision making.
- An exploratory pilot study in spinal surgery, future research will explore the use of OxVIC across different surgical specialities.
- Prospective quantitative data gathered from 20 participants, the introduction of a qualitative research element is planned for phase two of this study.
- A novel method to document the patient-clinician preoperative consent conversation.

1  
2  
3  
4  
5  
6  
7  
8  
9  
10  
11  
12  
13  
14  
15  
16  
17  
18  
19  
20  
21  
22  
23  
24  
25  
26  
27  
28  
29  
30  
31  
32  
33  
34  
35  
36  
37  
38  
39  
40  
41  
42  
43  
44  
45  
46  
47  
48  
49  
50  
51  
52  
53  
54  
55  
56  
57  
58  
59  
60

For peer review only

## INTRODUCTION

Informed consent is a legal and ethical principle that is required prior to any intervention that may violate autonomy. The *Montgomery v Lanarkshire* judgement (1) initiated a change in how healthcare professionals obtain informed consent.

*Montgomery* (1) confirms the shift from an already eroding paternalistic approach to consent set by *Bolam v Friem Hospital Management Committee*, (2), to the adoption and acknowledgment of a person-centred approach seen in *Sidaway v Bethlem Royal Hospital* (3), *De Freitas v O'Brien* (4) and *Bolitho v City & Hackney HA* (5).



1  
2  
3  
4 Others concur that *Montgomery* marked a decisive shift in the legal test of duty of  
5  
6  
7 care, from the perspective of the clinician to that of the patient (6).  
8  
9

10 Informed consent has gained accelerated momentum following the Montgomery  
11  
12  
13 judgement.  
14  
15

16  
17  
18  
19  
20  
21 In acknowledgement of the recent changes in consenting practice, the General  
22  
23  
24 Medical Council (GMC), the Royal College of Surgeons and other professional  
25  
26  
27 organisations, such as The British Association of Spinal Surgeons, have issued best  
28  
29  
30 practice guidelines on obtaining informed consent (7). However, despite the release  
31  
32  
33 of updated guidelines there is currently a gap in consenting practice relating to  
34  
35  
36  
37  
38 documenting the preoperative consent conversation.  
39  
40  
41  
42  
43  
44

45 Preparing to undergo surgery can be a stressful event for both patients and their  
46  
47  
48 families, often important information discussed within the consent consultation is  
49  
50  
51 forgotten (8). By providing patients access to a tool that captures their consent  
52  
53  
54 conversation, it is thought that the video will provide patients an opportunity to reflect  
55  
56  
57  
58  
59 and revisit the previously discussed dialog, prior to consenting to treatment. It  
60

1  
2  
3 encourages a bespoke individualised approach as indicated by Montgomery (1). The  
4  
5  
6  
7 addition of this step to the preoperative consenting process may safeguard patients  
8  
9  
10 from medical coercion and promote autonomy to make an informed decision about  
11  
12  
13  
14 their care, while reducing potential litigation claims.  
15  
16

17 Enhancements in digital technology are driving changes in information practices.

18  
19  
20  
21 Such enhancements have influenced how informed consent may be delivered (9),  
22  
23  
24 examples include the use of iPads to deliver consent information (10) and the use of  
25  
26  
27 a smartphone applications to assist informed consenting practice (11). The  
28  
29  
30  
31 acceptance of multimedia technology in preoperative consenting has been  
32  
33  
34 demonstrated across a variety of surgical disciplines, including foot and ankle surgery  
35  
36  
37 (12), spinal surgery (13), vascular surgery (14), ophthalmic surgery (15),  
38  
39  
40  
41 gastrointestinal surgery (16) and urological surgery (17). Notably, such preoperative  
42  
43  
44 multimedia consent technologies are often generic and not patient specific. There is  
45  
46  
47  
48 currently a lack of research regarding the use of personalised multimedia consenting  
49  
50  
51 adjuncts within surgery.  
52  
53  
54  
55  
56  
57  
58  
59  
60

1  
2  
3  
4 In order to improve service delivery and comply with the updated guidelines, we  
5  
6  
7 piloted a video consent tool (OxVIC) as an adjunct to traditional consenting methods  
8  
9  
10 for patients attending a spinal Preoperative Outpatient Assessment Clinic (POAC).  
11  
12

13  
14 Each consent video contained indications for surgery, associated risks and benefits,  
15  
16  
17 alternative treatment options and a section for patients to ask questions or clarify  
18  
19  
20 points. To our knowledge, the use of a video informed consent tool has not been  
21  
22  
23  
24 used before in spinal surgery.  
25  
26  
27  
28  
29  
30

31 Our study aims were to evaluate acceptability of a novel consent tool (OxVIC), as an  
32  
33  
34 adjunct to traditional (written and verbal) consenting methods. Aim to provide  
35  
36  
37  
38 documentary evidence of the patient – clinician consent conversation, which now  
39  
40  
41 forms part of the medical notes. Improve patient experience and enhance patient  
42  
43  
44  
45 satisfaction within the preoperative consent process, while generating an evidence  
46  
47  
48  
49 base for future research.  
50  
51  
52  
53  
54  
55  
56  
57  
58  
59  
60

## METHODS

1  
2  
3 Ethical approval for this project was obtained from the Health and Life Sciences  
4  
5  
6  
7 Faculty Research Ethics Committee (FREC) Oxford Brookes University, Oxford,  
8  
9  
10 England (FREC2016/57). In addition to the video consent process described below,  
11  
12  
13  
14 written informed consent was additionally obtained from all participants.  
15  
16  
17  
18  
19  
20  
21

## 22 Procedure

23  
24  
25 We conducted a single centre, non-randomised, non-comparative pilot study in  
26  
27  
28 patients undergoing a spinal procedure at an NHS spinal centre in the UK. A flowchart  
29  
30  
31 of the study procedure is outlined on Figure 1. Prior to consenting to take part, all  
32  
33  
34  
35 patients received a Participant Information Sheet (PIS). The PIS outlined that if  
36  
37  
38  
39 patients agreed to take part they would receive the “gold standard” (verbal and  
40  
41  
42 written) in consent information. In addition to this they would also receive a consent  
43  
44  
45 adjunct in the form of a personalised video.  
46  
47  
48  
49  
50  
51

52  
53 All participants who agreed to take part were consented by fellowship trained  
54  
55  
56 Consultant Spinal Surgeons using verbal and written consenting methods in addition  
57  
58  
59  
60

1  
2  
3 to a summary of the consent consultation being recorded. A researcher, independent  
4  
5  
6  
7 of the surgical team provided participants with patient information sheets prior to  
8  
9  
10 consenting. Participants were all informed that participation was voluntary and were  
11  
12  
13 free to withdraw at any time. The summary was conducted in a structured way and  
14  
15  
16 consisted of the following: a discussion around the patients reasoning for choosing  
17  
18  
19 surgery, followed by an overview of the surgical procedure, its intended benefits and  
20  
21  
22 associated risks ending with an opportunity for the patients to check their  
23  
24  
25 understanding by asking questions.  
26  
27  
28  
29

30  
31 A password protected email and a hospital trust approved web transfer service was  
32  
33  
34 used to send the personalised consent videos to study participants. Participants  
35  
36  
37 reviewed their personalised consent consultations at home with their family or friends.  
38  
39  
40  
41 Participants had the option to forward their personal consent videos to family members  
42  
43  
44 outside of the UK. All, participants were invited to contact the spinal team, to seek  
45  
46  
47 clarity or ask further questions regarding the video content (two participants utilised  
48  
49  
50 this service). The recorded consent was stored securely within the electronic health  
51  
52  
53 record, accessible only to the research team.  
54  
55  
56  
57  
58  
59  
60

1  
2  
3  
4 Participants were asked to contact the spinal team once they had reviewed the  
5  
6  
7 consent conversation, acknowledging the risks and benefits of the proposed  
8  
9  
10 treatment. Prospective patient data were obtained using a self-administered  
11  
12  
13 questionnaire regarding patient satisfaction with the use of a video consent tool as an  
14  
15  
16 adjunct to traditional consenting methods. Participants were invited to complete the  
17  
18  
19 measure following the consent consultation and after reviewing their personalised  
20  
21  
22 consent video.  
23  
24  
25  
26  
27  
28  
29  
30

31 Approximately 13 additional minutes were required compared to the traditional  
32  
33  
34 process to complete the video recording process. The mean recording time was 13  
35  
36  
37 minutes and 15 seconds, with a range of 6 minutes and 21 seconds, to 20 minutes  
38  
39  
40 and 55 seconds. This was dependant of the complexity of the proposed treatment  
41  
42  
43 and its associated risks and benefits. Introduction of the video consent tool did not  
44  
45  
46 endure any significant costs as the technology already existed within the Trust.  
47  
48  
49  
50  
51  
52  
53  
54  
55  
56  
57  
58  
59  
60

## Participants

Participants were recruited over a four month period (September to December 2017).

Twenty two people were approached to take part, two declined, twenty volunteered (n=20). Participants did not receive a honorarium for taking part in the study. Study inclusion criteria were: over the age of 18 years of age; have capacity to make informed decisions; and have an active email address with access to the internet.

Participants were excluded from the study if they had any visual or hearing impairments which may inhibit the ability to review the consent video.

## Assessments

A researcher independent of the surgical team distributed electronic Self-Administered Questionnaires (SAQ) to participants who agreed to partake in the study, data were collected at one point, post consent consultation. Participant demographics, which included gender, age, number of times the video consent tool was viewed and who they watched the video with, were collected. In addition to this, participants completed

1  
2  
3 the validated CSQ-8 tool. The CSQ-8 tool consists of eight self-report questions, each  
4  
5  
6  
7 constructed with a four point Likert scale reply (18). The minimum achievable  
8  
9  
10 satisfaction score is 8, indicating poor satisfaction, a maximum score of 32 would  
11  
12  
13 indicate high levels of satisfaction (19, 20). The CSQ-8 tool has been extensively  
14  
15  
16 tested for reliability and validity (19-21); to date it has been translated into more than  
17  
18  
19  
20  
21 30 languages since its first launch in the early 1980's (22). The CSQ-8 has been found  
22  
23  
24 to be acceptable for use in previous studies examining patient satisfaction with  
25  
26  
27  
28 consenting methods (17, 23).  
29  
30  
31  
32  
33  
34  
35  
36  
37  
38  
39  
40  
41

## 42 **Data analysis**

43  
44  
45 The data collection period finished once 20 completed SAQ's were received.  
46  
47

48  
49 Normality of data were assessed using a Kolmogorov-Smirnov test. Descriptive,  
50  
51

52 bivariate and inferential statistics were calculated and reported using two-tailed  
53  
54

55  
56 methods with the assistance a statistical program from IBM, SPSS 24 for Microsoft©  
57  
58

59 Windows version 10.  
60



## Patient and Public Involvement

Patients were not involved in the development or design of this pilot study. However, following this preliminary pilot study, patient involvement will be included in the development of subsequent studies utilising OxVIC.

## RESULTS

### Descriptive information

Over a four-month period, 20 participants (10:10, male: female) deemed suitable candidates for spinal procedures were recruited into the study. The mean age was 56 years ( $SD = 16.26$ ), range 27 to 81 years. Participant demographics can be seen in Table 1.

### Patient satisfaction

CSQ-8 data were normally distributed. High patient satisfaction levels were reported across a broad range of spinal procedures. The mean patient satisfaction score (CSQ-8) was 30.2 out of a maximum 32, indicative of high patient satisfaction.

1  
2  
3  
4  
5  
6  
7 The CSQ-8 scores by gender and age can be seen in Table .2. A two-way between  
8  
9  
10 groups analysis of variance was conducted to explore the impact of gender and age  
11  
12  
13 on patient satisfaction levels, as measured by the CSQ-8 scale. Participants were  
14  
15  
16 divided into five groups depending on their age ( Group 1: 25-34 years, Group 2: 45-  
17  
18 54 years, Group 3: 55-64 years, Group 4: 65-74 years and Group 5: 75-99 years)  
19  
20  
21  
22  
23  
24 The interaction effect between gender and age was not statistically significant ( $p =$   
25  
26  
27  
28 0.155).

29  
30  
31  
32  
33  
34  
35 The CSQ-8 responses generated several significant trends, a strong positive  
36  
37  
38 relationship between meeting patients 'preoperative consenting needs and helping  
39  
40  
41 them to deal more effectively with their preoperative concerns was reported ( $p =$   
42  
43  
44 0.028), with 80 % reporting that the tool helped a great deal. All participants  
45  
46  
47  
48 reported that they would recommend the video consent tool to others preparing for  
49  
50  
51  
52 surgery. When asked "if future treatment were required, would you use the service  
53  
54  
55 again?", all participants responded yes. A significant positive relationship between  
56  
57  
58  
59  
60

1  
2  
3 the quality of the service participants received versus the service they expected was  
4  
5  
6  
7 observed ( $p = 0.008$ ).  
8  
9  
10  
11  
12

### 13 14 **Engagement with the tool** 15

16  
17 All participants watched the consent video at least once prior to consenting for  
18  
19 surgery, with a mean number of viewings of 2-3 times. Eighty-five percent of the  
20  
21 participants watched the consent video with friends and family, which included next  
22  
23 of kin, partners, children and other family members. Two participants sent the  
24  
25 consent videos to their children living overseas. 15% of participants reported  
26  
27 watching their video alone. Those who watched the video 4 to 5 times on average  
28  
29 reported higher satisfaction scores.  
30  
31  
32  
33  
34  
35  
36  
37  
38  
39  
40  
41  
42  
43  
44  
45  
46  
47  
48  
49  
50

## 51 52 **DISCUSSION** 53

54 The main findings of our study were that participants were overall completely  
55  
56 satisfied with the video consent tool and the service. All participants reported that  
57  
58 that would use the service again if needed and that they would recommend the  
59  
60

1  
2  
3  
4 service to others requiring surgery. The mean CSQ-8 satisfaction score reported in  
5  
6  
7 this study was 30.2, with scores above 24 considered high levels of satisfaction (21).  
8  
9

10  
11  
12  
13  
14 It was beyond the scope of this exploratory pilot study to examine how the video  
15  
16  
17 consent tool compared to other methods of consent, such as audio recording of  
18  
19  
20 consent. Nonetheless, participant scores on the CSQ-8 in the present study indicate  
21  
22  
23 that the personalised video consent tool may be equal to, if not more effective than,  
24  
25  
26 the existing methods (e.g. audio recording alone) (17, 23). However, additional  
27  
28  
29 research is needed to further explore this possibility. Our preliminary results suggest  
30  
31  
32 that participants' age or gender did not affect patient satisfaction levels with the use  
33  
34  
35 of the video consent tool in the preoperative setting. This finding is consistent with  
36  
37  
38 previous studies (12, 24, 25).  
39  
40  
41  
42  
43  
44  
45  
46  
47  
48  
49  
50  
51  
52  
53  
54  
55  
56  
57  
58  
59  
60

61  
62  
63  
64  
65  
66  
67  
68  
69  
70  
71  
72  
73  
74  
75  
76  
77  
78  
79  
80  
81  
82  
83  
84  
85  
86  
87  
88  
89  
90  
91  
92  
93  
94  
95  
96  
97  
98  
99  
100

Busy preoperative clinics, poor communication techniques, unanswered questions, anxiety and poor comprehension are all barrier to patients not retaining information (26). Our study indicates that the use of personalised video tool may allow patients to process and review complex information previously discussed by the surgeon,

1  
2  
3  
4 from the comfort of their own home. Participants had the opportunity to email the  
5  
6  
7 spinal service for further clarity of the video content and two participants utilised this  
8  
9  
10 service.  
11  
12  
13  
14  
15  
16

17 Introduction of the video consent tool did not require significantly more clinician time.  
18  
19

20  
21 The ability to watch the video with family members, or even to securely send family  
22  
23  
24 members the video, allowed for shared decision making and aided a person-centred  
25  
26  
27 approach to care, empowering participants to manage their own medical information.  
28  
29

30  
31 This is important for patients outcomes as shared decision making facilitates  
32  
33  
34 increased patient satisfaction levels and potentially reduces illness uncertainty (27,  
35  
36  
37  
38 28).  
39  
40  
41  
42  
43  
44

45 All patients engaged with their personalised consent adjunct twice on average before  
46  
47  
48 consenting to surgery. To our knowledge, multiple interactions of a preoperative  
49  
50  
51 consent adjunct have not been reported in the literature (29). All patients were happy  
52  
53  
54 to recommend OxVIC to others requiring preoperative surgical consent, indicating  
55  
56  
57  
58 they were satisfied and it would be acceptable for further use.  
59  
60

1  
2  
3  
4  
5  
6  
7 This project found that, the more times participants watched their consent video, the  
8  
9  
10 more satisfied they became with their consent process. With the highest satisfaction  
11  
12  
13 scores in those who engaged with the video tool the most (4 to 5 times). Moreover,  
14  
15  
16 as the majority of studies using multimedia tools as an adjunct to informed consent  
17  
18  
19 do not personalise their content (27, 29), this is the first time that the use of a  
20  
21  
22  
23  
24  
25  
26  
27  
28  
29  
30  
31  
32  
33  
34  
35  
36  
37  
38  
39  
40  
41  
42  
43  
44  
45  
46  
47  
48  
49  
50  
51  
52  
53  
54  
55  
56  
57  
58  
59  
60  
personalised multimedia tool has been reported in the literature.

### **Clinical implications**

31  
32  
33  
34  
35 This study indicates that a personalised video consent tool is feasible to administer  
36  
37  
38 during the preoperative consent process for spinal surgery procedures and that the  
39  
40  
41  
42 intervention produced high satisfaction scores. Overall, we found approximately  
43  
44  
45  
46  
47  
48  
49  
50  
51  
52  
53  
54  
55  
56  
57  
58  
59  
60  
thirteen additional minutes were required compared to the traditional process to  
complete the video recording process.

51  
52  
53  
54  
55  
56  
57  
58  
59  
60  
This suggests that OxVIC would be acceptable for use, particularly in complex  
consultations where decision-making and communication might be more challenging  
for both the clinician and the patient.

1  
2  
3  
4  
5  
6  
7 While concerns over additional time, potential costs and practicality as to achieving  
8  
9  
10 this process are valid, they did not appear to be a significant barrier to delivering this  
11  
12  
13 service. Provided one has access to a good quality digital recording device, such as a  
14  
15  
16 smartphone that can transfer and store data securely, then the process can be  
17  
18  
19 straightforward.  
20  
21  
22

23  
24 We recognise that patients need to have access to the internet and may require help  
25  
26  
27 if not familiar using this sort of technology; however, as 85% of UK adults have a  
28  
29  
30 smartphone (30) and access to the internet in this is not an insurmountable barrier.  
31  
32

33  
34 Future studies exploring clinician experiences of obtaining patient consent via OxVIC  
35  
36  
37 would also be useful to ensure that any concerns or barriers to use that were not  
38  
39  
40 identified in the present study are considered and acceptably addressed.  
41  
42  
43

44  
45  
46 While we have not undertaken a cost analysis, for this pilot there have been no  
47  
48  
49 significant costs as the technology already exists within the NHS Trust. Introducing  
50  
51  
52 OxVIC into clinical practice has numerous benefits such as, documentary evidence  
53  
54  
55 of the clinician – patient consent conservation, which may reduce medicolegal cases.  
56  
57  
58  
59  
60

1  
2  
3  
4 It may be used as an educational tool for medical teaching and could act as a patient  
5  
6  
7 resource / decision aid, useful when analysing potential benefits and risks associated  
8  
9  
10 with surgery.  
11  
12  
13  
14  
15  
16

17 We would therefore suggest video consenting as a new bench mark in the consenting  
18  
19  
20 process. Based on this study, we recommend a large-scale study to evaluate the full  
21  
22  
23 impact of this process on outcome measures such as information retention, length of  
24  
25  
26 stay and litigation claims.  
27  
28  
29  
30  
31  
32  
33  
34  
35  
36  
37  
38  
39  
40  
41

### 42 **Strengths and limitations**

43  
44

45 This study has several strengths and weaknesses. Among the strengths was the  
46  
47  
48 development of a novel method to document the patient – clinician consent  
49  
50  
51 conversation. To our knowledge, this study is the first of its kind to provide preoperative  
52  
53  
54 patients with a personalised multimedia consent adjunct (OxVIC). Furthermore,  
55  
56  
57 OxVIC allows patients to review their consent conversation with family members and  
58  
59  
60



1  
2  
3 friends away from the clinical area, promoting shared decision making and patient  
4  
5  
6  
7 autonomy.  
8  
9

10  
11  
12  
13  
14 Among the weaknesses is the limited diversity of the sample (e.g. spinal surgery  
15  
16  
17 patients). Further studies could include the patient perspectives from other surgical  
18  
19  
20 specialities. In addition, quantitative data gathered within this pilot could be supported  
21  
22  
23 by the addition of qualitative research methods. While a standard NHS/Trust surgical  
24  
25  
26 consent form was used to promote surgeon adherence to standard information giving,  
27  
28  
29 the consent videos were not independently reviewed for validation purposes prior to  
30  
31  
32 patient access. The potential for standardisation should be considered in future  
33  
34  
35 studies of multimedia consenting.  
36  
37  
38  
39  
40  
41  
42  
43  
44

45 Finally, concerns regarding cost and additional consenting time could be perceived as  
46  
47  
48 a potential limitation. However, the ability to document the patient-clinical conversation  
49  
50  
51 and its potential application to medio-legal practice may outweigh such concerns. This  
52  
53  
54 needs to be considered in future feasibility studies.  
55  
56  
57  
58  
59  
60

## Future research

The findings from this pilot provide a foundation for potential future research projects.

A larger more diverse sample size to include younger (<25 years) and older (75yrs

+) people could add to the validity. Moreover, there is scope for the tool to be

included in other specialities and further research should examine the acceptability

of video consenting tool in multiple surgical disciplines. A larger study to definitively

test the efficacy of OxVIC across different surgical specialities is in process.

## Conclusion

If patient satisfaction is a measure of quality (31) this study indicates that the

introduction of a personalised consent tool may have a positive impact on the quality

of service patients receive. The provision of informed care could be facilitated by the

1  
2  
3 introduction of a personalised video tool, as it promotes patient autonomy, shared  
4  
5  
6  
7 decision making and empowers patients to manage their own health.  
8  
9  
10  
11  
12  
13  
14  
15  
16  
17  
18  
19  
20  
21  
22  
23  
24  
25  
26  
27  
28  
29  
30  
31  
32  
33  
34  
35  
36  
37  
38  
39  
40  
41  
42  
43  
44  
45  
46  
47  
48  
49  
50  
51  
52  
53  
54  
55  
56  
57  
58  
59  
60

For peer review only

1  
2  
3  
4  
5  
6  
7  
8  
9  
10 **AUTHOR CONTRIBUTIONS:**  
11

12  
13  
14 GM, CT and JR made substantial contributions to the conception of the study. GM  
15  
16  
17 analysed and interpreted the data for the study. GM, JR and DR contributed to  
18  
19  
20 acquisition of the data. GM, CT, VW, DR and JR drafted the article and revised it  
21  
22  
23 critically for important intellectual content. All authors gave final approval of the  
24  
25  
26 version to be published and agreed to be accountable for all aspects of the article in  
27  
28  
29 ensuring that questions related to the accuracy or integrity of any part of the article  
30  
31  
32 are appropriately investigated and resolved.  
33  
34  
35  
36  
37  
38  
39  
40  
41

42 **Funding:** This research received no specific grant from any funding agency.  
43  
44

45 **Competing interests:** None  
46  
47

48  
49 **Disclaimer:** This study has been presented via podium presentation at the 41<sup>st</sup>  
50  
51  
52 Annual Scientific Meeting of the Singapore Orthopaedic Association and at the Joint  
53  
54  
55 British Scoliosis Society / Irish Spine Society Meeting, 2018.  
56  
57

58  
59 **Patient consent:** Obtained  
60

**Ethics approval:** Oxford Brookes University, Faculty of Health Sciences Research

Ethics Committee (FREC2016/57).

**Data sharing statement:** We welcome data-sharing requests from researchers

interested in OxVIC. Please contact GM ([gerard.mawhinney@ouh.nhs.uk](mailto:gerard.mawhinney@ouh.nhs.uk)) directly to

explore further.

**Acknowledgements:** The authors would like to acknowledge the support received

from the spinal surgery department throughout the pilot and thank those who

volunteered to take part in the study.

**WORD COUNT: 3163**

**Table 1. Demographics of Study Participants**

| Demographics                              |         | Sample statistics |
|-------------------------------------------|---------|-------------------|
| Gender, N(%)                              | Male    | 10 (50%)          |
|                                           | Female  | 10 (50%)          |
| Participant age (years) <i>SD</i> = 16.26 | 25 – 34 | 2 (10%)           |
| Mean age – 56 years                       | 35 – 44 | 0 (0%)            |

|       |         |         |
|-------|---------|---------|
|       | 45 – 54 | 6 (30%) |
|       | 55 – 64 | 5 (25%) |
|       | 65 – 74 | 4 (20%) |
|       | 75 – 99 | 3 (15%) |
| Range | 27 – 81 |         |

|                                    |                      |          |
|------------------------------------|----------------------|----------|
| Variety of Surgical Procedures     | Deformity correction | 3        |
|                                    | Lumbar degenerative  | 6        |
|                                    | Nerve Root block     | 3        |
|                                    | Removal of metalwork | 1        |
|                                    | Tumour surgery       | 7        |
| Frequency of viewing consent video | Once                 | 7 (35%)  |
|                                    | 2 to 3 times         | 10 (50%) |
|                                    | 4 to 5 times         | 3 (15%)  |
| Video watched (with)               | Alone                | 3 (15%)  |
|                                    | Family and friends   | 17(85%)  |

Note. *SD* = standard deviation.

1  
2  
3  
4  
5  
6  
7  
8  
9  
10  
11 **Table 2. Mean CSQ-8 Scores by Age and Gender**  
12  
13

| Demographic                    | Mean CSQ-8 Score<br>(Maximum score 32) | Range ( <i>SD</i> ) |
|--------------------------------|----------------------------------------|---------------------|
| <b>Gender</b>                  |                                        |                     |
| Male                           | 30                                     | 26 – 32 (2.2)       |
| Female                         | 30.4                                   | 29 – 32 ( 1.07)     |
| Total Mean                     | 30.2                                   | 26 – 32 ( 1.70)     |
| <b>Participant Age (years)</b> |                                        |                     |
| 25 - 34                        | 31                                     | 30 – 32             |
| 35 - 44                        | -                                      | -                   |
| 45 – 54                        | 30.16                                  | 26 - 31             |
| 55 – 64                        | 29                                     | 26 – 31             |
| 65 – 74                        | 30.25                                  | 28 – 32             |
| 75 – 99                        | 31.66                                  | 31 – 32             |

1  
2  
3  
4  
5  
6  
7  
8  
9  
10  
11  
12  
13  
14  
15  
16  
17  
18  
19  
20  
21  
22  
23  
24  
25  
26  
27  
28  
29  
30  
31  
32  
33  
34  
35 Figure legend: Figure.1. An overview of the Oxford Video Informed Consent Tool  
36  
37  
38 (OxVIC) process  
39  
40  
41  
42  
43  
44  
45  
46  
47  
48  
49  
50  
51  
52  
53  
54  
55  
56  
57  
58  
59  
60



1  
2  
3  
4  
5  
6  
7  
8  
9  
10  
11  
12  
13  
14  
15  
16  
17  
18  
19  
20  
21  
22  
23  
24  
25  
26  
27  
28  
29  
30  
31  
32  
33  
34  
35  
36  
37  
38  
39  
40  
41  
42  
43  
44  
45  
46  
47  
48  
49  
50  
51  
52  
53  
54  
55  
56  
57  
58  
59  
60

For peer review only

## References

1. Montgomery v Lanarkshire Health Board Scotland. UKSC 11; 2015.
2. Bolam v Friern Hospital Management Committee. 1: WLR 583; 1957.
3. Sidaway v Board of Governors of the Bethlem Royal Hospital. 1: All ER 643; 1985.
4. De Freitas v O'Brien. P.I.Q.R. P281; 1995.
5. Bolitho (Deceased) v City & Hackney HA. P.I.Q.R. P334; 1997.
6. Herring. J FKMW, Dunn. M, Handa. A.I. Elbow room for best practice? Montgomery, patients' values, and balanced decision-making in person-centred clinical care. Medical Law Review. 2017;0(0):1-22.
7. Powell. J.M RA, Foy. M, Casey. A, Dabke. H, Gibson. A, Hutton. M. The 'three-legged stool' - A system for spinal informed consent. Bone Joint J. 2016;98:427-30.
8. Saigal R, Clark, A.J. Scheer, J.K. Smith, J.S. Bess, S. Mummaneni, P.V. McCarthy, I.M. Hart, R.A, Kebaish, K.M. Klineberg, R. Deviren, V. Schwab, F. Shaffrey. C, Ames. C. . Adult Spinal Deformity Patients Recall Fewer Than 50% of the

1  
2  
3 Risks Discussed in the Informed Consent Process Preoperatively and the Recall Rate

4  
5  
6  
7 Worsens Significantly in the Postoperative Period. SPINE. 2015;40:1079-85.

8  
9  
10 9. Grady. C CS, Rowbotham. M.C, McConnell. M.V, Ashley. E.A, Kang. G.

11  
12  
13 'Informed Consent'. New England Journal of Medicine. 2017;376:856-67.

14  
15  
16  
17 10. Rowbotham MCA, J. Greene, K. Cummings, S.R. . Interactive Informed

18  
19  
20 Consent: Randomised Comparison with Paper Consents. PLOS One.

21  
22  
23  
24 2013;8(3):e58603.

25  
26  
27  
28 11. McConnell MVSA, Pavlovic. A, Homburger, T. et al. . Feasibility of obtaining

29  
30  
31 measures of lifestyle from a smartphone app: the My Heart Counts Cardiovascular

32  
33  
34 Health Study. JAMA. 2017;2:67-76.

35  
36  
37  
38 12. Batuyong. E.D JAJL, Wickramasinghe. N, Beischer, A. Using multimedia to

39  
40  
41 enhance the consent process for bunion correction surgery. ANZ J Surgery.

42  
43  
44  
45 2014;84:249-54.

46  
47  
48  
49 13. Briggs MW, C. Aprajay, G. 'Digital multimedia books produced using iBook

50  
51  
52 Author for preoperative surgical patient information. Journal of Visual Communication

53  
54  
55  
56 in Medicine. 2014;37(3):59-64.

- 1  
2  
3  
4 14. Bowers NE, E. Montbriand, J. Jaskolka, J. Roche-Nagle, G. Using a multimedia  
5  
6  
7 presentation to improve patient understanding and satisfaction with informed consent  
8  
9  
10 for minimally invasive vascular proceddures. The Surgeon, Journal of the Royal  
11  
12  
13 Colleges of Surgeons of Edinburgh & Ireland. 2015;17(7-11).  
14  
15  
16  
17 15. Tipotsch-Maca. S VR, Ginzel. C, Vecsei-Mrlovits. P. Effect of Multimedia-  
18  
19  
20 assisted informed consent procedure on the information gain, satisfaction, and anxiety  
21  
22  
23 of cataract surgery patients. Journal of Cataract Reflective Surgery. 2016;42:110-6.  
24  
25  
26  
27 16. Eggers. C OR, Koerfer. A, Thomas. W, Koele. K, Hoelscher. A, Bollschweiler.  
28  
29  
30 E. A Multimedia Tool for the Informed Consent of Patients prior to Gastic Banding.  
31  
32  
33 Obesity. 2007;15(11):2866-73.  
34  
35  
36  
37  
38 17. Winter. M KJ, Nalavenkata. S, Hardy. E, Handmer. M, Ainsworth. H, Lee. W.G,  
39  
40  
41 Louie-Johnsun. M. The use of portable video media vs standard verbal communication  
42  
43  
44 in the urological consent process: a multicentre, ransomised controlled , crossover  
45  
46  
47 trial. British Journal of Urology Int. 2016;118:823-8.  
48  
49  
50  
51  
52 18. Nguyen TD, Attkisson CC, Stegner BL. Assessment of patient satisfaction:  
53  
54  
55 development and refinement of a service evaluation questionnaire. Eval Program  
56  
57  
58 Plann. 1983;6(3-4):299-313.  
59  
60

- 1  
2  
3  
4 19. Attkisson CC, Zwick, R. . The client satisfaction questionnaire: Psychometric  
5  
6  
7 properties and correlations with service utilisation and psychotherapy outcome'.  
8  
9  
10 Evaluation Program Planning. 1983;5(3):233-7.  
11  
12  
13  
14 20. Larson DLA, C.C. Hargreaves, W.A, Nguyen, T.D. . Assessment of client /  
15  
16  
17 patient satisfaction: development and refinement of a service evaluation  
18  
19  
20 questionnaire. Evaluation Program Planning. 1979;6(3):299-313.  
21  
22  
23  
24 21. Nguyen TDA, C.C. Stegner, B.L. . Assessment of patient satisfaction:  
25  
26  
27 development and refinement of a service evaluation questionnaire. Evaluation  
28  
29  
30 Program Planning. 1983;6(4):299-313.  
31  
32  
33  
34 22. LLC TMS. CSQ Scales <http://www.csq scales.com/csq-translations.htm>2018  
35  
36  
37 [Available from: <http://www.csq scales.com/csq-translations.htm>.  
38  
39  
40  
41  
42 23. Sahai A, Kucheria R, Challacombe B, Dasgupta P. Video consent: a pilot study  
43  
44  
45 of informed consent in laparoscopic urology and its impact on patient satisfaction.  
46  
47  
48 JSLS. 2006;10(1):21-5.  
49  
50  
51  
52 24. Bollschweiler EA, J. Obliers. R, Koerfer. A, Mönig. S, Metzger. R, Hölscher. H.  
53  
54  
55 Improving Informed Consent of Surgical Patients Using a Multimedia-Based Program?  
56  
57  
58  
59  
60

1  
2  
3  
4 Results of a Prospective Randomised Multicentre Study of Patients Before  
5  
6  
7 Cholecystectomy. *Annals of Surgery*. 2008;248(2):205-11.  
8  
9

10 25. Gyomber D, Lawrentschuk, N, Wong, P, Parker, F, Bolton, D. Improving  
11  
12 informed consent for patients undergoing radical prostatectomy using multimedia  
13  
14 techniques: a prospective randomised crossover study. *BJU International*.  
15  
16  
17 2010;106:1152-6.  
18  
19  
20  
21  
22

23  
24 26. Wang CA, P. Beischer, A. . The Use of Multimedia as an Adjunct to the  
25  
26 Informed Consent Process for Morton's Neuroma Resection Surgery. *Foot & Ankle*  
27  
28 *International*. 2014;35(10):1037-44.  
29  
30  
31  
32

33  
34 27. Stacey DL, F. Lewis, K. Barry, M.J. Bennett, C.L, Eden. K.B, Holmes-Rover. M,  
35  
36 Llewellyn-Thomas. H, Lydiatt. A, Trevena. L. Decision aids for people facing health  
37  
38 treatment or screening decisions (Review). *Cochrane Database of Systematic*  
39  
40 *Reviews*. 2017(4).  
41  
42  
43  
44  
45  
46  
47

48 28. Hallock JLRR, Handa, V.L. . Patient satisfaction and informed consent for  
49  
50 surgery. *American Journal of Obstetrics and Gynaecology*. 2017;181:e1-7.  
51  
52  
53  
54  
55  
56  
57  
58  
59  
60

1  
2  
3  
4 29. Nehme JE-K, U, Chow, A, Hakky, S, Ahmend, A, Pirkayastha, S. The Use of  
5  
6  
7 Multimedia Consent Programs for Surgical Procedures: A Systematic Review.  
8  
9  
10 Surgical Innovation. 2013;20(1):13-23.  
11

12  
13  
14 30. UK C. UK smartphone penetration continues to rise to 85% of adult population

15  
16  
17 UK: Consultancy.uk; 2017 [Available from:

18  
19  
20  
21 [https://www.consultancy.uk/news/14113/uk-smartphone-penetration-continues-to-](https://www.consultancy.uk/news/14113/uk-smartphone-penetration-continues-to-rise-to-85-of-adult-population)  
22  
23  
24 [rise-to-85-of-adult-population.](https://www.consultancy.uk/news/14113/uk-smartphone-penetration-continues-to-rise-to-85-of-adult-population)  
25  
26

27  
28 31. Sacks GDL, E.H. Dawes, A.J. Russell, M.M. Maggard-Gibbons, M. Zingmond,

29  
30  
31 D.Z. Ko, C.Y. . Relationship Between Hospital Performance on a Patient Satisfaction

32  
33  
34  
35 Survey and Surgical Quality. JAMA Surg. 2015;150(9):858-64.  
36  
37  
38  
39  
40  
41  
42  
43  
44  
45  
46  
47  
48  
49  
50  
51  
52  
53  
54  
55  
56  
57  
58  
59  
60

Figure.1. An overview of the Oxford Video Informed Consent Tool (OxVIC) process

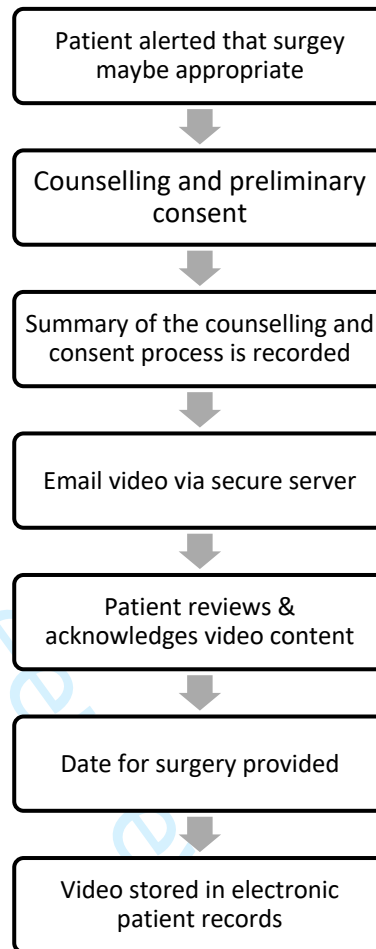

Supplement: bmjopen-2018-027712.draft_revisions.pdf [file bmjopen-2018-027712.draft_revisions.pdf]
